# Supplementary material
Source: MDPI journal article supplement (https://www.mdpi.com/2072-4292/8/10/836)

# Supplementary Materials: Evaluation of the Performance of Three Satellite Precipitation Products over Africa

Aleix Serrat-Capdevila, Manuel Merino, Juan B Valdes and Matej Durcik

For the interested reader, we include here scatterplots and the values of error statistics shown in Table 2 of the manuscript for each satellite precipitation product, each season and each latitudinal band, climatic and topographic zones.

## Table of Contents

|                                                                                                |     |
|------------------------------------------------------------------------------------------------|-----|
| A. Raw Estimates Error Analysis for Latitudinal Bands. ....                                    | S2  |
| B. Raw Estimates Error Analysis for Koppen Geiger Climatic Zones .....                         | S11 |
| C. Raw Estimates Error Analysis for Topographic Classification Zones. ....                     | S16 |
| D. Bias Corrected Estimates Error Analysis for Latitudinal Bands.....                          | S19 |
| E. Bias Corrected Estimates Error Analysis for Koppen Geiger Climatic Classification Zones.... | S28 |
| F. Bias Corrected Estimates Error Analysis for Topographic Classification Zones. ....          | S33 |

## A. Raw Estimates Error Analysis for Latitudinal Bands.

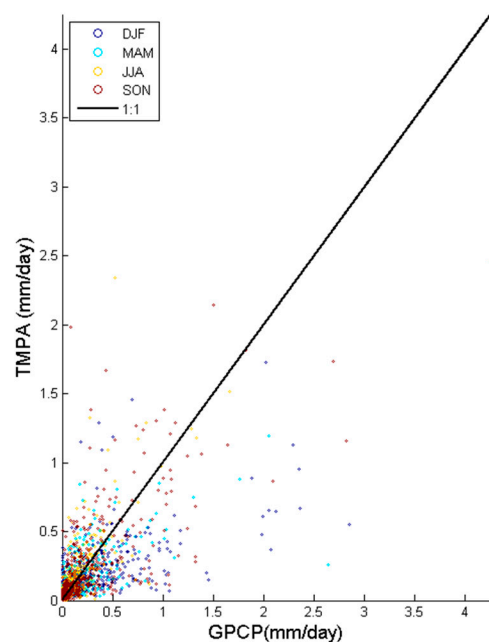

| STATISTIC              | DJF    | MAM   | JJA   | SON   | ALL   |
|------------------------|--------|-------|-------|-------|-------|
| N                      | 542    | 552   | 552   | 546   | 2192  |
| Mean SPP (mm/day)      | 0.19   | 0.14  | 0.13  | 0.22  | 0.17  |
| Mean GPCP (mm/day)     | 0.26   | 0.14  | 0.10  | 0.23  | 0.18  |
| Std. dev. SPP (mm/d... | 0.18   | 0.15  | 0.22  | 0.31  | 0.23  |
| Std. dev. SPP (mm/d... | 0.38   | 0.24  | 0.18  | 0.38  | 0.31  |
| Bias (%)               | -27.03 | 1.22  | 25.06 | -6.49 | -7.67 |
| MSE from mean          | 0.00   | 0.00  | 0.00  | 0.00  | 0.00  |
| MSE from variance      | 0.04   | 0.01  | 0.00  | 0.00  | 0.01  |
| MSE from correlation   | 0.06   | 0.02  | 0.02  | 0.07  | 0.05  |
| MSE                    | 0.10   | 0.03  | 0.02  | 0.07  | 0.06  |
| RMSE                   | 0.32   | 0.18  | 0.14  | 0.27  | 0.24  |
| Correlation coeff.     | 0.589  | 0.667 | 0.782 | 0.717 | 0.661 |
| Nash-Sutcliffe Eff.    | 0.303  | 0.443 | 0.394 | 0.500 | 0.431 |
| Max. SPP rainfall      | 1.73   | 1.19  | 2.34  | 2.46  | 2.46  |
| Max. GPCP rainfall     | 2.85   | 2.64  | 1.67  | 4.25  | 4.25  |
| Min. SPP rainfall      | 0.02   | 0.01  | 0.00  | 0.00  | 0.00  |
| Min. GPCP rainfall     | 0.00   | 0.00  | 0.00  | 0.00  | 0.00  |

Figure A-1. TMPA band A.

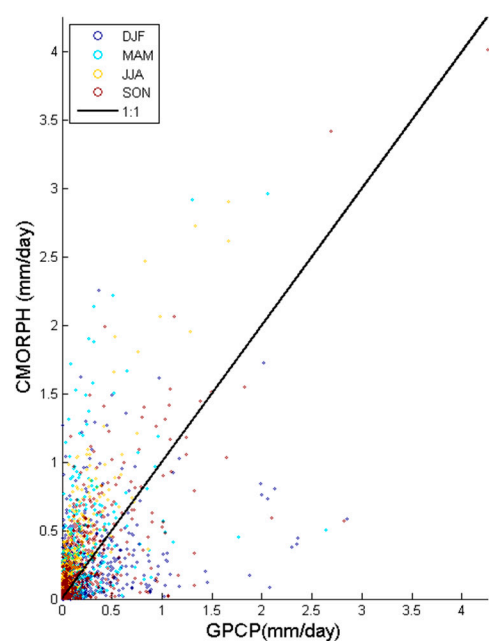

| STATISTIC              | DJF    | MAM    | JJA    | SON   | ALL    |
|------------------------|--------|--------|--------|-------|--------|
| N                      | 542    | 552    | 552    | 546   | 2192   |
| Mean SPP (mm/day)      | 0.22   | 0.26   | 0.24   | 0.27  | 0.25   |
| Mean GPCP (mm/day)     | 0.26   | 0.14   | 0.10   | 0.23  | 0.18   |
| Std. dev. SPP (mm/d... | 0.29   | 0.36   | 0.35   | 0.38  | 0.35   |
| Std. dev. SPP (mm/d... | 0.38   | 0.24   | 0.18   | 0.38  | 0.31   |
| Bias (%)               | -13.04 | 85.32  | 135.18 | 13.79 | 35.43  |
| MSE from mean          | 0.00   | 0.01   | 0.02   | 0.00  | 0.00   |
| MSE from variance      | 0.01   | 0.01   | 0.03   | 0.00  | 0.00   |
| MSE from correlation   | 0.15   | 0.09   | 0.02   | 0.09  | 0.10   |
| MSE                    | 0.16   | 0.12   | 0.07   | 0.09  | 0.11   |
| RMSE                   | 0.40   | 0.34   | 0.26   | 0.29  | 0.33   |
| Correlation coeff.     | 0.306  | 0.473  | 0.860  | 0.703 | 0.526  |
| Nash-Sutcliffe Eff.    | -0.110 | -1.098 | -1.103 | 0.388 | -0.109 |
| Max. SPP rainfall      | 2.26   | 2.96   | 2.90   | 4.01  | 4.01   |
| Max. GPCP rainfall     | 2.85   | 2.64   | 1.67   | 4.25  | 4.25   |
| Min. SPP rainfall      | 0.00   | 0.00   | 0.00   | 0.00  | 0.00   |
| Min. GPCP rainfall     | 0.00   | 0.00   | 0.00   | 0.00  | 0.00   |

Figure A-2. CMORH band A.

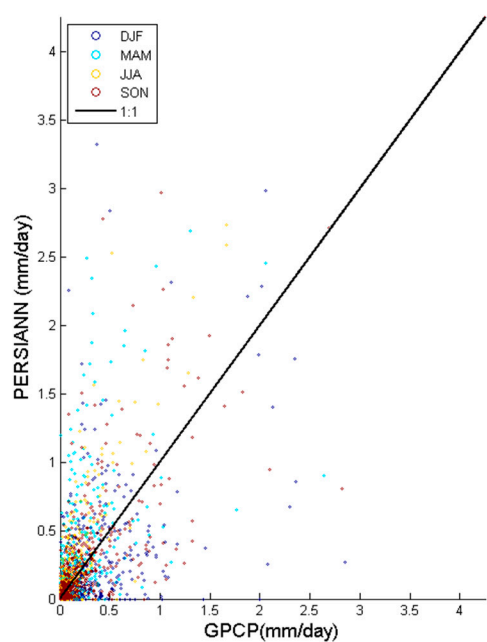

| STATISTIC              | DJF    | MAM    | JJA    | SON   | ALL    |
|------------------------|--------|--------|--------|-------|--------|
| N                      | 542    | 552    | 552    | 546   | 2192   |
| Mean SPP (mm/day)      | 0.20   | 0.23   | 0.18   | 0.25  | 0.22   |
| Mean GPCP (mm/day)     | 0.26   | 0.14   | 0.10   | 0.23  | 0.18   |
| Std. dev. SPP (mm/d... | 0.40   | 0.40   | 0.33   | 0.43  | 0.39   |
| Std. dev. SPP (mm/d... | 0.38   | 0.24   | 0.18   | 0.38  | 0.31   |
| Bias (%)               | -20.73 | 65.02  | 71.00  | 8.64  | 18.08  |
| MSE from mean          | 0.00   | 0.01   | 0.01   | 0.00  | 0.00   |
| MSE from variance      | 0.00   | 0.03   | 0.02   | 0.00  | 0.01   |
| MSE from correlation   | 0.15   | 0.09   | 0.02   | 0.09  | 0.10   |
| MSE                    | 0.16   | 0.12   | 0.05   | 0.09  | 0.10   |
| RMSE                   | 0.39   | 0.35   | 0.21   | 0.30  | 0.32   |
| Correlation coeff.     | 0.494  | 0.547  | 0.841  | 0.726 | 0.606  |
| Nash-Sutcliffe Eff.    | -0.070 | -1.167 | -0.433 | 0.353 | -0.062 |
| Max. SPP rainfall      | 3.32   | 2.69   | 2.73   | 4.25  | 4.25   |
| Max. GPCP rainfall     | 2.85   | 2.64   | 1.67   | 4.25  | 4.25   |
| Min. SPP rainfall      | 0.00   | 0.00   | 0.00   | 0.00  | 0.00   |
| Min. GPCP rainfall     | 0.00   | 0.00   | 0.00   | 0.00  | 0.00   |

Figure A-3. PERSIANN band A.

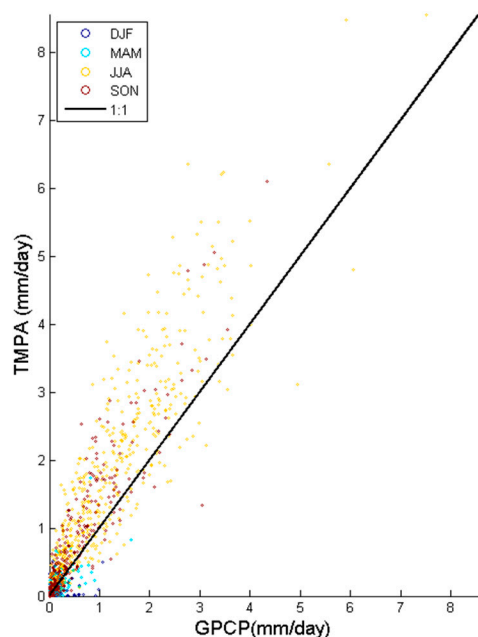

| STATISTIC              | DJF    | MAM   | JJA   | SON   | ALL   |
|------------------------|--------|-------|-------|-------|-------|
| N                      | 542    | 552   | 552   | 546   | 2192  |
| Mean SPP (mm/day)      | 0.03   | 0.06  | 1.66  | 0.47  | 0.56  |
| Mean GPCP (mm/day)     | 0.03   | 0.06  | 1.14  | 0.32  | 0.39  |
| Std. dev. SPP (mm/d... | 0.05   | 0.13  | 1.42  | 0.83  | 1.06  |
| Std. dev. SPP (mm/d... | 0.11   | 0.14  | 1.07  | 0.60  | 0.77  |
| Bias (%)               | -14.56 | 4.94  | 46.38 | 45.66 | 43.23 |
| MSE from mean          | 0.00   | 0.00  | 0.28  | 0.02  | 0.03  |
| MSE from variance      | 0.00   | 0.00  | 0.12  | 0.06  | 0.09  |
| MSE from correlation   | 0.01   | 0.01  | 0.32  | 0.07  | 0.11  |
| MSE                    | 0.01   | 0.01  | 0.72  | 0.15  | 0.22  |
| RMSE                   | 0.10   | 0.10  | 0.85  | 0.38  | 0.47  |
| Correlation coeff.     | 0.329  | 0.699 | 0.896 | 0.930 | 0.934 |
| Nash-Sutcliffe Eff.    | 0.089  | 0.436 | 0.377 | 0.584 | 0.619 |
| Max. SPP rainfall      | 0.51   | 1.74  | 8.55  | 6.11  | 8.55  |
| Max. GPCP rainfall     | 1.06   | 1.64  | 7.52  | 4.34  | 7.52  |
| Min. SPP rainfall      | 0.00   | 0.00  | 0.00  | 0.00  | 0.00  |
| Min. GPCP rainfall     | 0.00   | 0.00  | 0.00  | 0.00  | 0.00  |

Figure A-4. TMPA Band B.

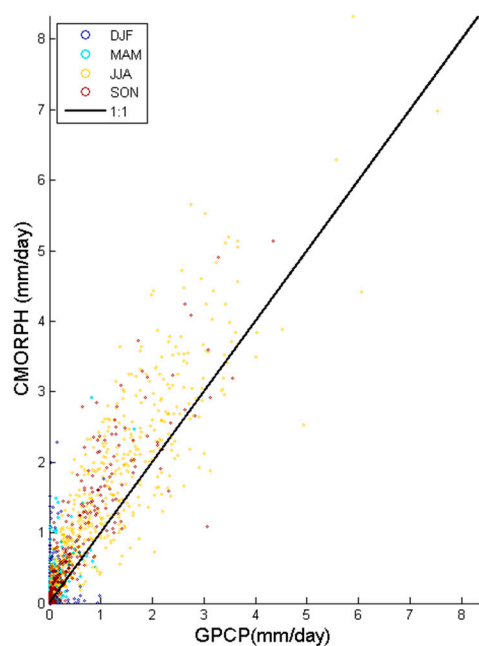

| STATISTIC              | DJF    | MAM    | JJA   | SON   | ALL   |
|------------------------|--------|--------|-------|-------|-------|
| N                      | 542    | 552    | 552   | 546   | 2192  |
| Mean SPP (mm/day)      | 0.13   | 0.16   | 1.54  | 0.51  | 0.59  |
| Mean GPCP (mm/day)     | 0.03   | 0.06   | 1.14  | 0.32  | 0.39  |
| Std. dev. SPP (mm/d... | 0.26   | 0.28   | 1.25  | 0.82  | 0.96  |
| Std. dev. SPP (mm/d... | 0.11   | 0.14   | 1.07  | 0.60  | 0.77  |
| Bias (%)               | 275.75 | 153.20 | 35.77 | 57.19 | 50.15 |
| MSE from mean          | 0.01   | 0.01   | 0.16  | 0.03  | 0.04  |
| MSE from variance      | 0.02   | 0.02   | 0.03  | 0.05  | 0.04  |
| MSE from correlation   | 0.05   | 0.02   | 0.33  | 0.09  | 0.13  |
| MSE                    | 0.08   | 0.05   | 0.53  | 0.17  | 0.21  |
| RMSE                   | 0.28   | 0.23   | 0.73  | 0.42  | 0.46  |
| Correlation coeff.     | 0.191  | 0.686  | 0.876 | 0.907 | 0.910 |
| Nash-Sutcliffe Eff.    | -5.846 | -1.697 | 0.540 | 0.511 | 0.643 |
| Max. SPP rainfall      | 2.29   | 2.92   | 8.33  | 5.14  | 8.33  |
| Max. GPCP rainfall     | 1.06   | 1.64   | 7.52  | 4.34  | 7.52  |
| Min. SPP rainfall      | 0.00   | 0.00   | 0.01  | 0.00  | 0.00  |
| Min. GPCP rainfall     | 0.00   | 0.00   | 0.00  | 0.00  | 0.00  |

Figure A-5. CMORPH band B.

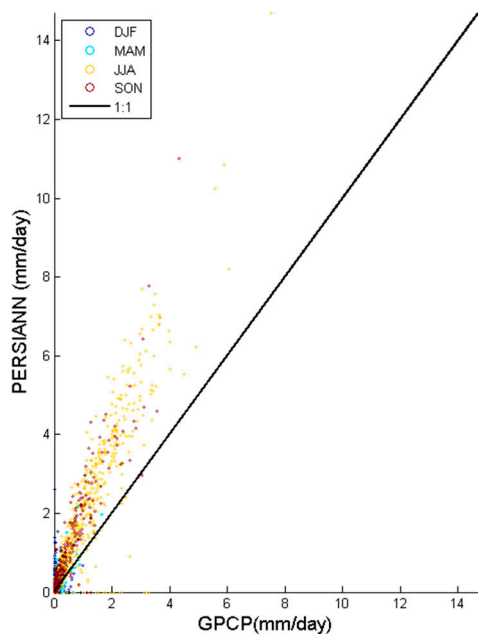

| STATISTIC              | DJF    | MAM    | JJA    | SON    | ALL    |
|------------------------|--------|--------|--------|--------|--------|
| N                      | 542    | 552    | 552    | 546    | 2192   |
| Mean SPP (mm/day)      | 0.11   | 0.10   | 2.08   | 0.65   | 0.74   |
| Mean GPCP (mm/day)     | 0.03   | 0.06   | 1.14   | 0.32   | 0.39   |
| Std. dev. SPP (mm/d... | 0.27   | 0.23   | 1.95   | 1.16   | 1.41   |
| Std. dev. SPP (mm/d... | 0.11   | 0.14   | 1.07   | 0.60   | 0.77   |
| Bias (%)               | 220.00 | 68.23  | 83.18  | 102.77 | 89.62  |
| MSE from mean          | 0.01   | 0.00   | 0.89   | 0.11   | 0.12   |
| MSE from variance      | 0.03   | 0.01   | 0.78   | 0.32   | 0.41   |
| MSE from correlation   | 0.04   | 0.02   | 0.37   | 0.08   | 0.13   |
| MSE                    | 0.07   | 0.03   | 2.04   | 0.51   | 0.66   |
| RMSE                   | 0.26   | 0.16   | 1.43   | 0.72   | 0.81   |
| Correlation coeff.     | 0.376  | 0.741  | 0.912  | 0.939  | 0.940  |
| Nash-Sutcliffe Eff.    | -4.784 | -0.405 | -0.765 | -0.437 | -0.131 |
| Max. SPP rainfall      | 2.96   | 2.18   | 14.71  | 11.01  | 14.71  |
| Max. GPCP rainfall     | 1.06   | 1.64   | 7.52   | 4.34   | 7.52   |
| Min. SPP rainfall      | 0.00   | 0.00   | 0.00   | 0.00   | 0.00   |
| Min. GPCP rainfall     | 0.00   | 0.00   | 0.00   | 0.00   | 0.00   |

Figure A-6. PERSIANN band B.



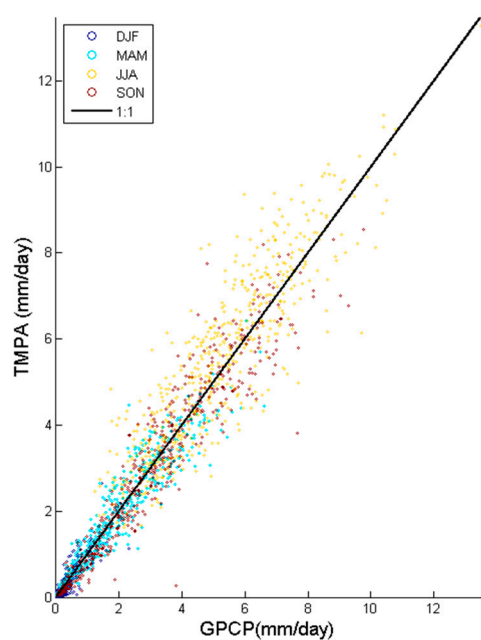

| STATISTIC              | DJF   | MAM   | JJA   | SON   | ALL   |
|------------------------|-------|-------|-------|-------|-------|
| N                      | 542   | 552   | 552   | 546   | 2192  |
| Mean SPP (mm/day)      | 0.26  | 1.89  | 5.50  | 2.89  | 2.64  |
| Mean GPCP (mm/day)     | 0.24  | 1.93  | 5.19  | 2.97  | 2.59  |
| Std. dev. SPP (mm/d... | 0.31  | 1.23  | 2.03  | 2.09  | 2.48  |
| Std. dev. SPP (mm/d... | 0.29  | 1.33  | 2.00  | 2.12  | 2.41  |
| Bias (%)               | 4.67  | -1.91 | 5.88  | -2.74 | 1.93  |
| MSE from mean          | 0.00  | 0.00  | 0.09  | 0.01  | 0.00  |
| MSE from variance      | 0.00  | 0.01  | 0.00  | 0.00  | 0.01  |
| MSE from correlation   | 0.02  | 0.18  | 0.93  | 0.38  | 0.40  |
| MSE                    | 0.02  | 0.19  | 1.02  | 0.38  | 0.41  |
| RMSE                   | 0.16  | 0.44  | 1.01  | 0.62  | 0.64  |
| Correlation coeff.     | 0.869 | 0.944 | 0.886 | 0.957 | 0.967 |
| Nash-Sutcliffe Eff.    | 0.715 | 0.891 | 0.743 | 0.914 | 0.930 |
| Max. SPP rainfall      | 2.64  | 6.43  | 13.29 | 8.54  | 13.29 |
| Max. GPCP rainfall     | 2.32  | 6.60  | 13.48 | 9.75  | 13.48 |
| Min. SPP rainfall      | 0.02  | 0.04  | 1.61  | 0.04  | 0.02  |
| Min. GPCP rainfall     | 0.00  | 0.00  | 1.22  | 0.03  | 0.00  |

Figure A-7. TMPA Band C.

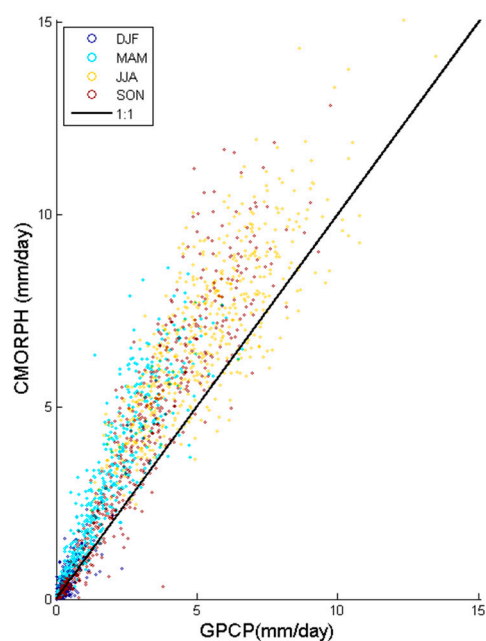

| STATISTIC              | DJF   | MAM    | JJA    | SON   | ALL   |
|------------------------|-------|--------|--------|-------|-------|
| N                      | 542   | 552    | 552    | 546   | 2192  |
| Mean SPP (mm/day)      | 0.31  | 3.08   | 6.83   | 4.02  | 3.57  |
| Mean GPCP (mm/day)     | 0.24  | 1.93   | 5.19   | 2.97  | 2.59  |
| Std. dev. SPP (mm/d... | 0.38  | 2.04   | 2.14   | 3.00  | 3.14  |
| Std. dev. SPP (mm/d... | 0.29  | 1.33   | 2.00   | 2.12  | 2.41  |
| Bias (%)               | 27.98 | 59.77  | 31.46  | 35.29 | 37.77 |
| MSE from mean          | 0.00  | 1.32   | 2.67   | 1.10  | 0.96  |
| MSE from variance      | 0.01  | 0.50   | 0.02   | 0.78  | 0.54  |
| MSE from correlation   | 0.05  | 0.53   | 1.55   | 0.79  | 0.84  |
| MSE                    | 0.06  | 2.36   | 4.23   | 2.66  | 2.34  |
| RMSE                   | 0.25  | 1.53   | 2.06   | 1.63  | 1.53  |
| Correlation coeff.     | 0.771 | 0.901  | 0.819  | 0.938 | 0.944 |
| Nash-Sutcliffe Eff.    | 0.261 | -0.334 | -0.064 | 0.404 | 0.597 |
| Max. SPP rainfall      | 2.73  | 8.62   | 15.07  | 12.84 | 15.07 |
| Max. GPCP rainfall     | 2.32  | 6.60   | 13.48  | 9.75  | 13.48 |
| Min. SPP rainfall      | 0.00  | 0.07   | 2.31   | 0.03  | 0.00  |
| Min. GPCP rainfall     | 0.00  | 0.00   | 1.22   | 0.03  | 0.00  |

Figure A-8. CMORPH band C.

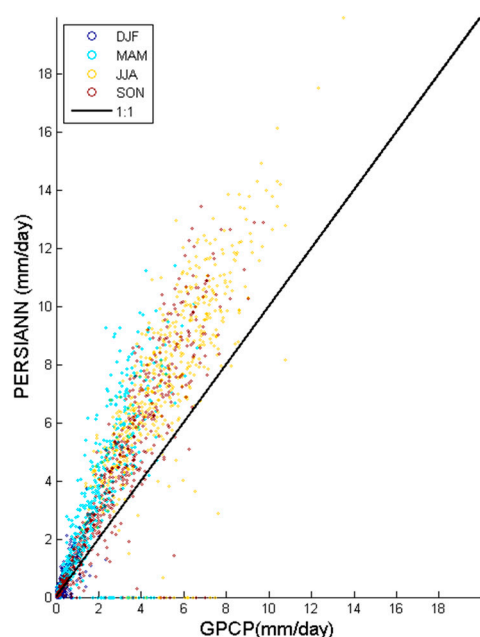

| STATISTIC              | DJF    | MAM    | JJA    | SON   | ALL   |
|------------------------|--------|--------|--------|-------|-------|
| N                      | 542    | 552    | 552    | 546   | 2192  |
| Mean SPP (mm/day)      | 0.31   | 3.27   | 7.50   | 4.26  | 3.85  |
| Mean GPCP (mm/day)     | 0.24   | 1.93   | 5.19   | 2.97  | 2.59  |
| Std. dev. SPP (mm/d... | 0.45   | 2.58   | 2.99   | 3.29  | 3.64  |
| Std. dev. SPP (mm/d... | 0.29   | 1.33   | 2.00   | 2.12  | 2.41  |
| Bias (%)               | 29.09  | 69.63  | 44.39  | 43.51 | 48.50 |
| MSE from mean          | 0.01   | 1.80   | 5.31   | 1.67  | 1.58  |
| MSE from variance      | 0.02   | 1.56   | 0.98   | 1.37  | 1.51  |
| MSE from correlation   | 0.06   | 1.46   | 2.91   | 1.32  | 1.54  |
| MSE                    | 0.09   | 4.82   | 9.20   | 4.36  | 4.64  |
| RMSE                   | 0.30   | 2.20   | 3.03   | 2.09  | 2.15  |
| Correlation coeff.     | 0.768  | 0.787  | 0.756  | 0.905 | 0.912 |
| Nash-Sutcliffe Eff.    | -0.042 | -1.729 | -1.311 | 0.025 | 0.200 |
| Max. SPP rainfall      | 3.74   | 11.40  | 19.93  | 13.42 | 19.93 |
| Max. GPCP rainfall     | 2.32   | 6.60   | 13.48  | 9.75  | 13.48 |
| Min. SPP rainfall      | 0.00   | 0.00   | 0.00   | 0.00  | 0.00  |
| Min. GPCP rainfall     | 0.00   | 0.00   | 1.22   | 0.03  | 0.00  |

Figure A-9. PERSIANN band C.

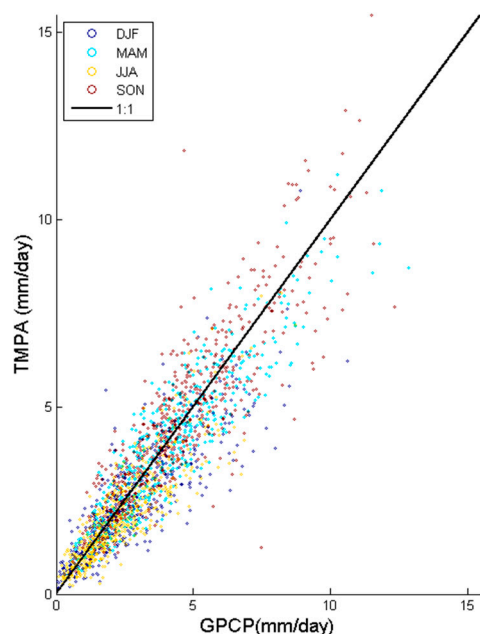

| STATISTIC              | DJF    | MAM   | JJA    | SON   | ALL   |
|------------------------|--------|-------|--------|-------|-------|
| N                      | 542    | 552   | 552    | 546   | 2192  |
| Mean SPP (mm/day)      | 2.35   | 3.90  | 2.10   | 4.72  | 3.27  |
| Mean GPCP (mm/day)     | 2.64   | 4.02  | 2.35   | 4.60  | 3.40  |
| Std. dev. SPP (mm/d... | 1.45   | 1.86  | 1.24   | 2.22  | 2.04  |
| Std. dev. SPP (mm/d... | 1.78   | 2.07  | 1.44   | 2.21  | 2.11  |
| Bias (%)               | -10.82 | -3.02 | -10.84 | 2.55  | -4.00 |
| MSE from mean          | 0.08   | 0.01  | 0.06   | 0.01  | 0.02  |
| MSE from variance      | 0.11   | 0.04  | 0.04   | 0.00  | 0.00  |
| MSE from correlation   | 0.74   | 0.69  | 0.47   | 1.30  | 0.86  |
| MSE                    | 0.93   | 0.75  | 0.57   | 1.31  | 0.89  |
| RMSE                   | 0.96   | 0.86  | 0.75   | 1.14  | 0.94  |
| Correlation coeff.     | 0.857  | 0.911 | 0.869  | 0.868 | 0.900 |
| Nash-Sutcliffe Eff.    | 0.707  | 0.826 | 0.723  | 0.730 | 0.801 |
| Max. SPP rainfall      | 10.78  | 11.19 | 8.05   | 15.46 | 15.46 |
| Max. GPCP rainfall     | 10.62  | 12.85 | 8.70   | 12.33 | 12.85 |
| Min. SPP rainfall      | 0.15   | 0.50  | 0.22   | 0.59  | 0.15  |
| Min. GPCP rainfall     | 0.06   | 0.39  | 0.10   | 0.59  | 0.06  |

Figure A-10. TMPA Band D.

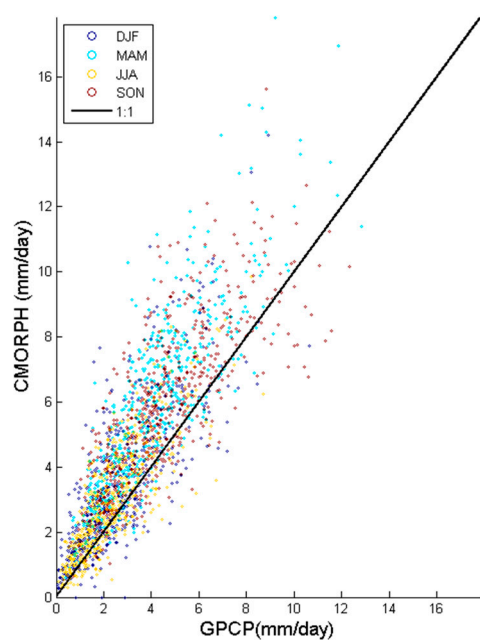

| STATISTIC              | DJF   | MAM    | JJA   | SON   | ALL   |
|------------------------|-------|--------|-------|-------|-------|
| N                      | 542   | 552    | 552   | 546   | 2192  |
| Mean SPP (mm/day)      | 3.53  | 5.75   | 2.98  | 5.90  | 4.54  |
| Mean GPCP (mm/day)     | 2.64  | 4.02   | 2.35  | 4.60  | 3.40  |
| Std. dev. SPP (mm/d... | 2.29  | 2.72   | 1.70  | 2.38  | 2.64  |
| Std. dev. SPP (mm/d... | 1.78  | 2.07   | 1.44  | 2.21  | 2.11  |
| Bias (%)               | 33.63 | 43.13  | 26.95 | 28.28 | 33.49 |
| MSE from mean          | 0.79  | 3.01   | 0.40  | 1.69  | 1.30  |
| MSE from variance      | 0.25  | 0.42   | 0.07  | 0.03  | 0.28  |
| MSE from correlation   | 1.68  | 1.73   | 0.87  | 2.38  | 1.75  |
| MSE                    | 2.72  | 5.16   | 1.34  | 4.10  | 3.33  |
| RMSE                   | 1.65  | 2.27   | 1.16  | 2.02  | 1.82  |
| Correlation coeff.     | 0.794 | 0.847  | 0.822 | 0.773 | 0.843 |
| Nash-Sutcliffe Eff.    | 0.144 | -0.202 | 0.349 | 0.157 | 0.255 |
| Max. SPP rainfall      | 14.20 | 17.83  | 9.86  | 15.63 | 17.83 |
| Max. GPCP rainfall     | 10.62 | 12.85  | 8.70  | 12.33 | 12.85 |
| Min. SPP rainfall      | 0.00  | 0.60   | 0.28  | 0.62  | 0.00  |
| Min. GPCP rainfall     | 0.06  | 0.39   | 0.10  | 0.59  | 0.06  |

Figure A-11. CMORPH Band D.

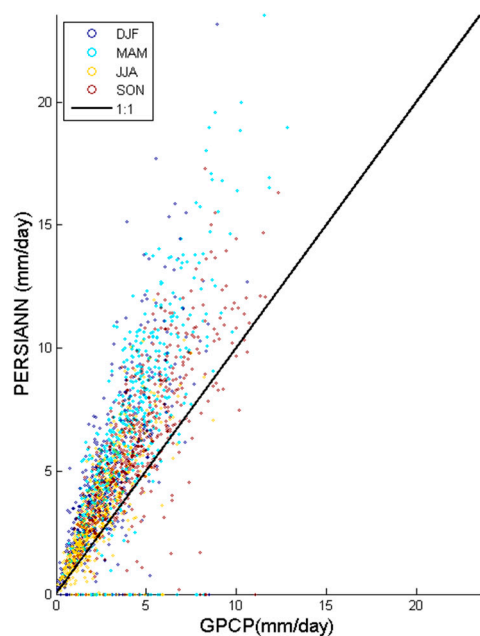

| STATISTIC              | DJF    | MAM    | JJA    | SON    | ALL    |
|------------------------|--------|--------|--------|--------|--------|
| N                      | 542    | 552    | 552    | 546    | 2192   |
| Mean SPP (mm/day)      | 4.34   | 6.50   | 3.22   | 6.13   | 5.05   |
| Mean GPCP (mm/day)     | 2.64   | 4.02   | 2.35   | 4.60   | 3.40   |
| Std. dev. SPP (mm/d... | 3.26   | 3.87   | 2.11   | 3.03   | 3.41   |
| Std. dev. SPP (mm/d... | 1.78   | 2.07   | 1.44   | 2.21   | 2.11   |
| Bias (%)               | 64.45  | 61.75  | 37.08  | 33.25  | 48.38  |
| MSE from mean          | 2.89   | 6.16   | 0.76   | 2.34   | 2.71   |
| MSE from variance      | 2.19   | 3.25   | 0.46   | 0.67   | 1.67   |
| MSE from correlation   | 2.39   | 3.50   | 1.31   | 3.36   | 2.94   |
| MSE                    | 7.48   | 12.92  | 2.53   | 6.37   | 7.32   |
| RMSE                   | 2.73   | 3.59   | 1.59   | 2.52   | 2.71   |
| Correlation coeff.     | 0.795  | 0.782  | 0.784  | 0.748  | 0.796  |
| Nash-Sutcliffe Eff.    | -1.351 | -2.010 | -0.228 | -0.309 | -0.637 |
| Max. SPP rainfall      | 23.16  | 23.55  | 11.98  | 17.28  | 23.55  |
| Max. GPCP rainfall     | 10.62  | 12.85  | 8.70   | 12.33  | 12.85  |
| Min. SPP rainfall      | 0.00   | 0.00   | 0.00   | 0.00   | 0.00   |
| Min. GPCP rainfall     | 0.06   | 0.39   | 0.10   | 0.59   | 0.06   |

Figure A-12. PERSIANN band D.

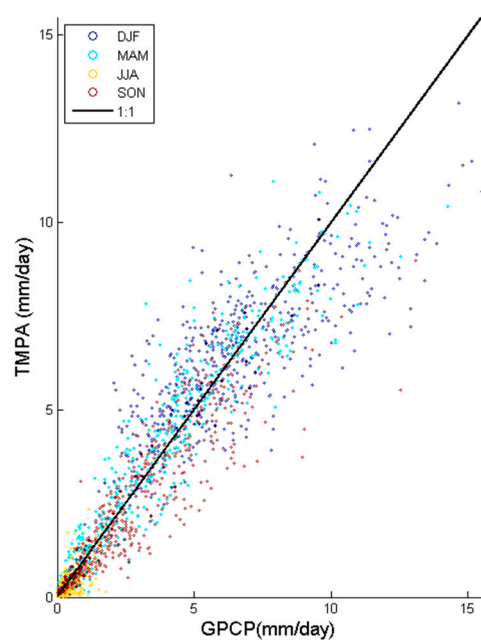

| STATISTIC              | DJF   | MAM   | JJA    | SON    | ALL   |
|------------------------|-------|-------|--------|--------|-------|
| N                      | 542   | 552   | 552    | 546    | 2192  |
| Mean SPP (mm/day)      | 6.45  | 3.34  | 0.22   | 2.47   | 3.11  |
| Mean GPCP (mm/day)     | 6.50  | 3.24  | 0.25   | 2.83   | 3.19  |
| Std. dev. SPP (mm/d... | 1.92  | 2.75  | 0.31   | 1.99   | 2.97  |
| Std. dev. SPP (mm/d... | 2.68  | 2.85  | 0.34   | 2.30   | 3.17  |
| Bias (%)               | -0.77 | 3.21  | -12.05 | -12.62 | -2.59 |
| MSE from mean          | 0.00  | 0.01  | 0.00   | 0.13   | 0.01  |
| MSE from variance      | 0.57  | 0.01  | 0.00   | 0.10   | 0.04  |
| MSE from correlation   | 2.13  | 0.75  | 0.06   | 0.80   | 1.08  |
| MSE                    | 2.70  | 0.77  | 0.06   | 1.03   | 1.13  |
| RMSE                   | 1.64  | 0.88  | 0.25   | 1.01   | 1.06  |
| Correlation coeff.     | 0.793 | 0.952 | 0.710  | 0.912  | 0.942 |
| Nash-Sutcliffe Eff.    | 0.623 | 0.905 | 0.454  | 0.805  | 0.888 |
| Max. SPP rainfall      | 13.18 | 11.11 | 2.33   | 10.08  | 13.18 |
| Max. GPCP rainfall     | 15.48 | 14.24 | 1.78   | 13.07  | 15.48 |
| Min. SPP rainfall      | 1.78  | 0.03  | 0.00   | 0.07   | 0.00  |
| Min. GPCP rainfall     | 1.00  | 0.00  | 0.00   | 0.02   | 0.00  |

Figure A-13. TMPA band E.

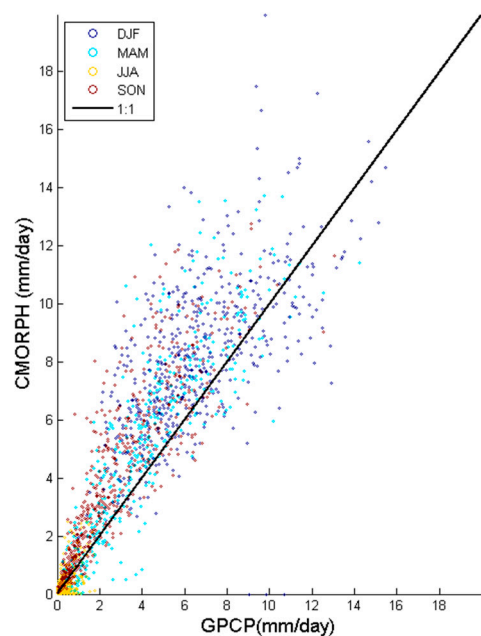

| STATISTIC              | DJF    | MAM   | JJA   | SON   | ALL   |
|------------------------|--------|-------|-------|-------|-------|
| N                      | 542    | 552   | 552   | 546   | 2192  |
| Mean SPP (mm/day)      | 8.08   | 4.01  | 0.27  | 4.05  | 4.09  |
| Mean GPCP (mm/day)     | 6.50   | 3.24  | 0.25  | 2.83  | 3.19  |
| Std. dev. SPP (mm/d... | 2.63   | 3.50  | 0.44  | 2.93  | 3.82  |
| Std. dev. SPP (mm/d... | 2.68   | 2.85  | 0.34  | 2.30  | 3.17  |
| Bias (%)               | 24.33  | 24.00 | 10.54 | 43.04 | 28.12 |
| MSE from mean          | 2.50   | 0.60  | 0.00  | 1.49  | 0.80  |
| MSE from variance      | 0.00   | 0.43  | 0.01  | 0.40  | 0.42  |
| MSE from correlation   | 5.38   | 1.73  | 0.10  | 1.77  | 2.36  |
| MSE                    | 7.88   | 2.76  | 0.11  | 3.66  | 3.58  |
| RMSE                   | 2.81   | 1.66  | 0.33  | 1.91  | 1.89  |
| Correlation coeff.     | 0.619  | 0.913 | 0.676 | 0.868 | 0.903 |
| Nash-Sutcliffe Eff.    | -0.100 | 0.659 | 0.070 | 0.305 | 0.645 |
| Max. SPP rainfall      | 19.97  | 13.72 | 2.95  | 12.78 | 19.97 |
| Max. GPCP rainfall     | 15.48  | 14.24 | 1.78  | 13.07 | 15.48 |
| Min. SPP rainfall      | 0.00   | 0.00  | 0.00  | 0.04  | 0.00  |
| Min. GPCP rainfall     | 1.00   | 0.00  | 0.00  | 0.02  | 0.00  |

Figure A-14. CMORPH band E.

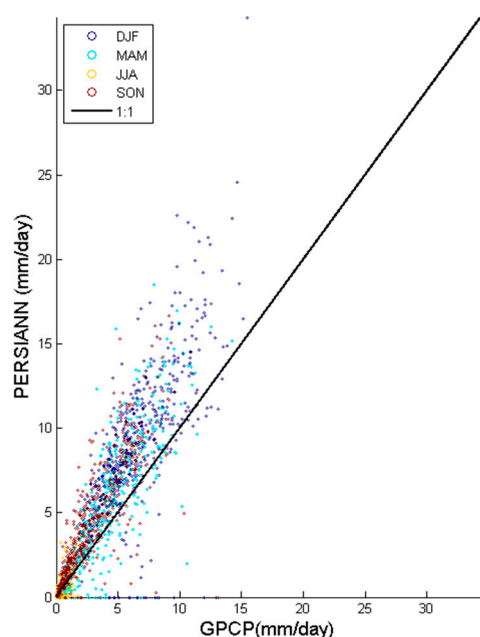

| STATISTIC              | DJF    | MAM   | JJA    | SON    | ALL   |
|------------------------|--------|-------|--------|--------|-------|
| N                      | 542    | 552   | 552    | 546    | 2192  |
| Mean SPP (mm/day)      | 8.98   | 4.11  | 0.25   | 4.24   | 4.37  |
| Mean GPCP (mm/day)     | 6.50   | 3.24  | 0.25   | 2.83   | 3.19  |
| Std. dev. SPP (mm/d... | 4.28   | 4.03  | 0.53   | 3.40   | 4.60  |
| Std. dev. SPP (mm/d... | 2.68   | 2.85  | 0.34   | 2.30   | 3.17  |
| Bias (%)               | 38.11  | 27.00 | 0.26   | 49.75  | 37.11 |
| MSE from mean          | 6.14   | 0.76  | 0.00   | 1.99   | 1.40  |
| MSE from variance      | 2.58   | 1.39  | 0.04   | 1.22   | 2.02  |
| MSE from correlation   | 6.81   | 2.50  | 0.12   | 2.45   | 3.03  |
| MSE                    | 15.53  | 4.66  | 0.15   | 5.66   | 6.45  |
| RMSE                   | 3.94   | 2.16  | 0.39   | 2.38   | 2.54  |
| Correlation coeff.     | 0.703  | 0.891 | 0.675  | 0.843  | 0.896 |
| Nash-Sutcliffe Eff.    | -1.168 | 0.426 | -0.332 | -0.074 | 0.359 |
| Max. SPP rainfall      | 34.33  | 18.50 | 3.35   | 17.40  | 34.33 |
| Max. GPCP rainfall     | 15.48  | 14.24 | 1.78   | 13.07  | 15.48 |
| Min. SPP rainfall      | 0.00   | 0.00  | 0.00   | 0.00   | 0.00  |
| Min. GPCP rainfall     | 1.00   | 0.00  | 0.00   | 0.02   | 0.00  |

Figure A-15. PERSIANN band E.

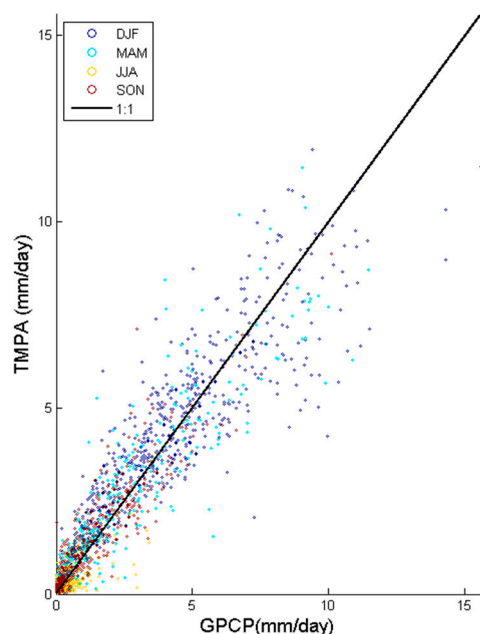

| STATISTIC              | DJF   | MAM   | JJA   | SON   | ALL   |
|------------------------|-------|-------|-------|-------|-------|
| N                      | 542   | 552   | 552   | 546   | 2192  |
| Mean SPP (mm/day)      | 4.56  | 1.70  | 0.24  | 1.23  | 1.92  |
| Mean GPCP (mm/day)     | 4.44  | 1.60  | 0.25  | 1.10  | 1.84  |
| Std. dev. SPP (mm/d... | 2.21  | 2.07  | 0.27  | 1.29  | 2.30  |
| Std. dev. SPP (mm/d... | 2.67  | 2.22  | 0.46  | 1.34  | 2.44  |
| Bias (%)               | 2.51  | 5.70  | -3.24 | 11.66 | 4.38  |
| MSE from mean          | 0.01  | 0.01  | 0.00  | 0.02  | 0.01  |
| MSE from variance      | 0.21  | 0.02  | 0.03  | 0.00  | 0.02  |
| MSE from correlation   | 1.59  | 0.67  | 0.08  | 0.30  | 0.70  |
| MSE                    | 1.82  | 0.70  | 0.11  | 0.31  | 0.73  |
| RMSE                   | 1.35  | 0.83  | 0.34  | 0.56  | 0.85  |
| Correlation coeff.     | 0.865 | 0.927 | 0.677 | 0.914 | 0.937 |
| Nash-Sutcliffe Eff.    | 0.745 | 0.858 | 0.452 | 0.824 | 0.877 |
| Max. SPP rainfall      | 11.94 | 11.44 | 2.18  | 9.14  | 11.94 |
| Max. GPCP rainfall     | 15.56 | 11.44 | 3.42  | 10.09 | 15.56 |
| Min. SPP rainfall      | 0.04  | 0.03  | 0.02  | 0.04  | 0.02  |
| Min. GPCP rainfall     | 0.00  | 0.00  | 0.00  | 0.00  | 0.00  |

Figure A-16. TMPA band F.



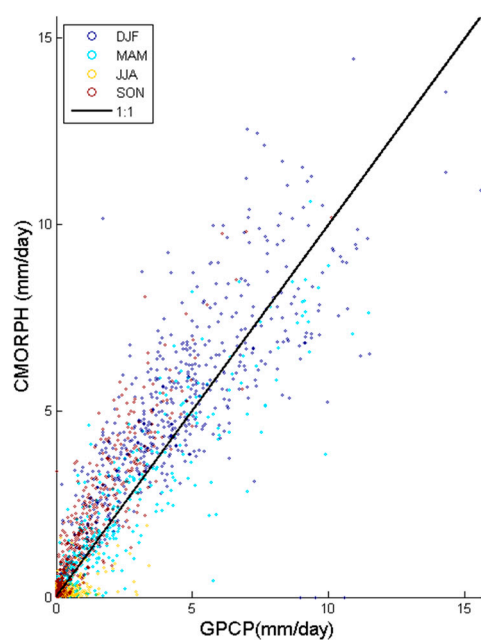

| STATISTIC              | DJF   | MAM   | JJA    | SON   | ALL   |
|------------------------|-------|-------|--------|-------|-------|
| N                      | 542   | 552   | 552    | 546   | 2192  |
| Mean SPP (mm/day)      | 5.11  | 1.56  | 0.16   | 1.69  | 2.12  |
| Mean GPCP (mm/day)     | 4.44  | 1.60  | 0.25   | 1.10  | 1.84  |
| Std. dev. SPP (mm/d... | 2.46  | 1.99  | 0.20   | 1.84  | 2.58  |
| Std. dev. SPP (mm/d... | 2.67  | 2.22  | 0.46   | 1.34  | 2.44  |
| Bias (%)               | 15.07 | -2.64 | -36.64 | 52.75 | 15.03 |
| MSE from mean          | 0.45  | 0.00  | 0.01   | 0.34  | 0.08  |
| MSE from variance      | 0.04  | 0.05  | 0.06   | 0.25  | 0.02  |
| MSE from correlation   | 2.85  | 0.74  | 0.09   | 0.43  | 1.23  |
| MSE                    | 3.35  | 0.79  | 0.16   | 1.03  | 1.32  |
| RMSE                   | 1.83  | 0.89  | 0.40   | 1.01  | 1.15  |
| Correlation coeff.     | 0.783 | 0.916 | 0.537  | 0.912 | 0.903 |
| Nash-Sutcliffe Eff.    | 0.530 | 0.838 | 0.239  | 0.425 | 0.778 |
| Max. SPP rainfall      | 14.44 | 10.61 | 1.94   | 10.19 | 14.44 |
| Max. GPCP rainfall     | 15.56 | 11.44 | 3.42   | 10.09 | 15.56 |
| Min. SPP rainfall      | 0.00  | 0.01  | 0.01   | 0.01  | 0.00  |
| Min. GPCP rainfall     | 0.00  | 0.00  | 0.00   | 0.00  | 0.00  |

Figure A-17. CMORPH band F.

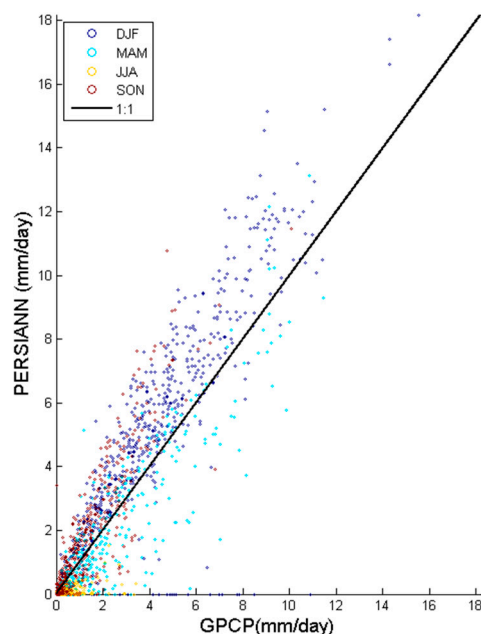

| STATISTIC              | DJF   | MAM    | JJA    | SON   | ALL   |
|------------------------|-------|--------|--------|-------|-------|
| N                      | 542   | 552    | 552    | 546   | 2192  |
| Mean SPP (mm/day)      | 5.44  | 1.32   | 0.04   | 1.49  | 2.06  |
| Mean GPCP (mm/day)     | 4.44  | 1.60   | 0.25   | 1.10  | 1.84  |
| Std. dev. SPP (mm/d... | 3.33  | 2.08   | 0.12   | 1.97  | 2.98  |
| Std. dev. SPP (mm/d... | 2.67  | 2.22   | 0.46   | 1.34  | 2.44  |
| Bias (%)               | 22.48 | -17.46 | -84.20 | 34.90 | 11.89 |
| MSE from mean          | 1.00  | 0.08   | 0.05   | 0.15  | 0.05  |
| MSE from variance      | 0.43  | 0.02   | 0.11   | 0.40  | 0.29  |
| MSE from correlation   | 2.79  | 0.81   | 0.05   | 0.51  | 1.25  |
| MSE                    | 4.22  | 0.90   | 0.21   | 1.07  | 1.59  |
| RMSE                   | 2.05  | 0.95   | 0.46   | 1.03  | 1.26  |
| Correlation coeff.     | 0.843 | 0.913  | 0.547  | 0.903 | 0.914 |
| Nash-Sutcliffe Eff.    | 0.406 | 0.816  | -0.004 | 0.403 | 0.733 |
| Max. SPP rainfall      | 18.18 | 13.12  | 1.53   | 11.47 | 18.18 |
| Max. GPCP rainfall     | 15.56 | 11.44  | 3.42   | 10.09 | 15.56 |
| Min. SPP rainfall      | 0.00  | 0.00   | 0.00   | 0.00  | 0.00  |
| Min. GPCP rainfall     | 0.00  | 0.00   | 0.00   | 0.00  | 0.00  |

Figure A-18. PERSIANN band F.

## B. Raw Estimates Error Analysis for Koppen Geiger Climatic Zones

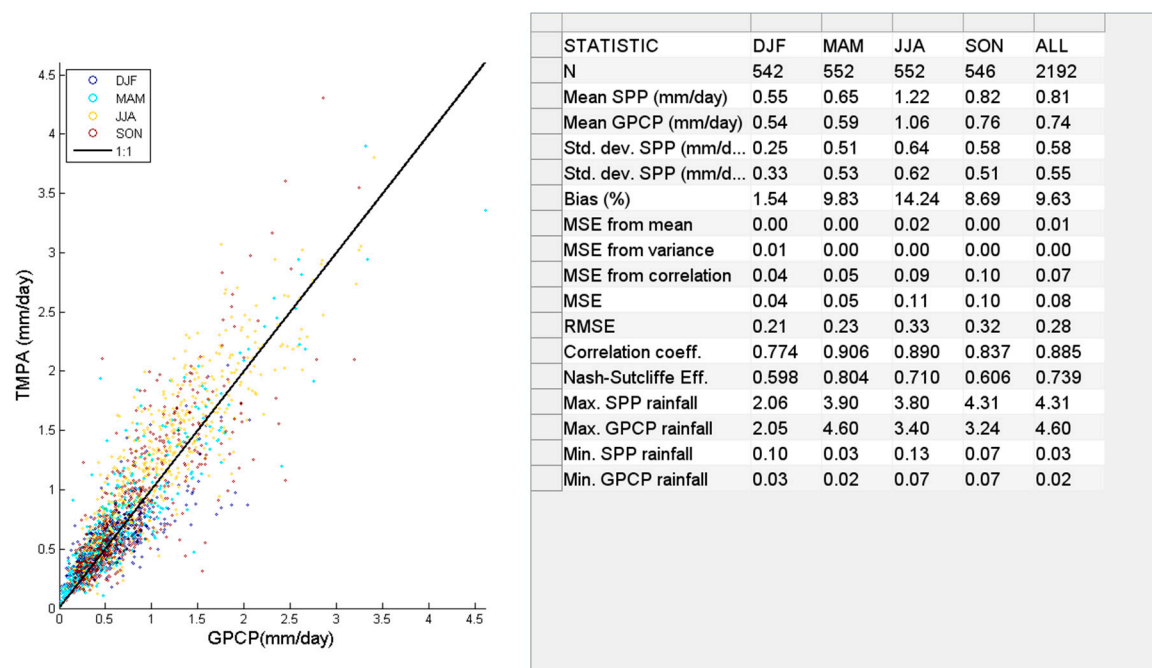

Figure B-1. Arid zones, TMPA.

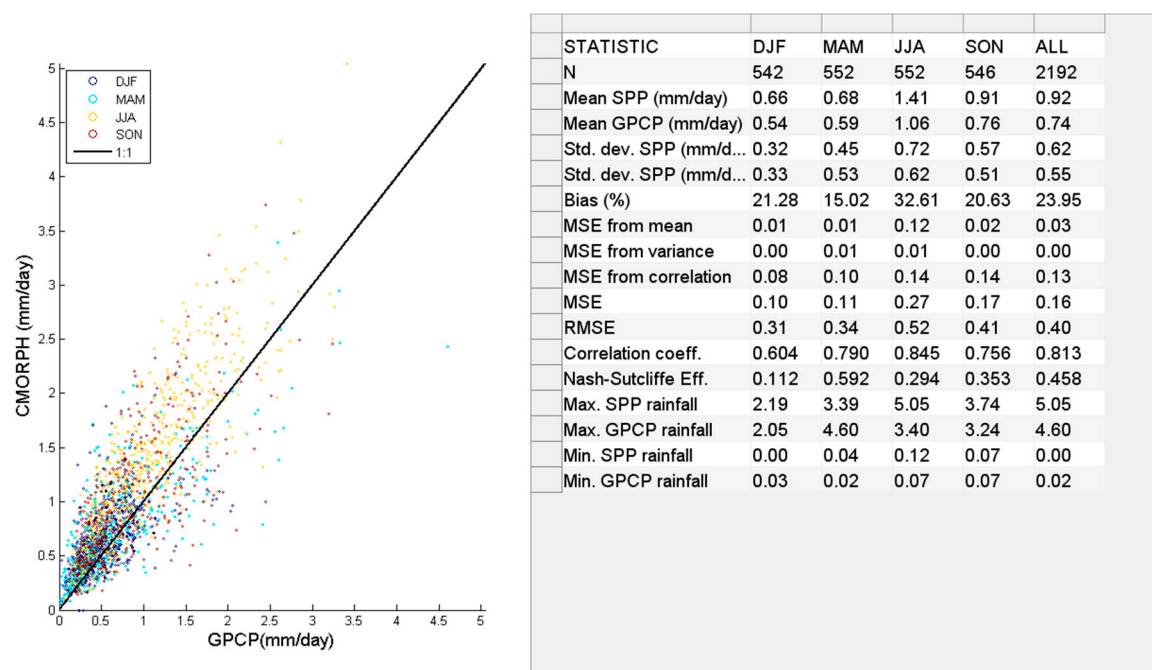

Figure B-2. Arid zones, CMORPH.



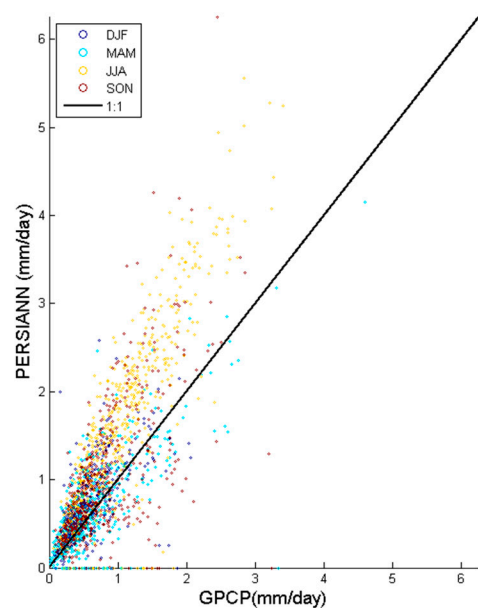

| STATISTIC              | DJF    | MAM   | JJA    | SON    | ALL    |
|------------------------|--------|-------|--------|--------|--------|
| N                      | 542    | 552   | 552    | 546    | 2192   |
| Mean SPP (mm/day)      | 0.67   | 0.61  | 1.67   | 0.95   | 0.98   |
| Mean GPCP (mm/day)     | 0.54   | 0.59  | 1.06   | 0.76   | 0.74   |
| Std. dev. SPP (mm/d... | 0.41   | 0.52  | 1.02   | 0.75   | 0.83   |
| Std. dev. SPP (mm/d... | 0.33   | 0.53  | 0.62   | 0.51   | 0.55   |
| Bias (%)               | 23.93  | 3.48  | 56.49  | 25.50  | 31.99  |
| MSE from mean          | 0.02   | 0.00  | 0.36   | 0.04   | 0.06   |
| MSE from variance      | 0.01   | 0.00  | 0.16   | 0.06   | 0.08   |
| MSE from correlation   | 0.10   | 0.13  | 0.18   | 0.26   | 0.19   |
| MSE                    | 0.12   | 0.13  | 0.70   | 0.36   | 0.33   |
| RMSE                   | 0.35   | 0.36  | 0.84   | 0.60   | 0.57   |
| Correlation coeff.     | 0.642  | 0.771 | 0.859  | 0.663  | 0.791  |
| Nash-Sutcliffe Eff.    | -0.097 | 0.543 | -0.839 | -0.340 | -0.086 |
| Max. SPP rainfall      | 2.58   | 4.15  | 5.55   | 6.26   | 6.26   |
| Max. GPCP rainfall     | 2.05   | 4.60  | 3.40   | 3.24   | 4.60   |
| Min. SPP rainfall      | 0.00   | 0.00  | 0.00   | 0.00   | 0.00   |
| Min. GPCP rainfall     | 0.03   | 0.02  | 0.07   | 0.07   | 0.02   |

Figure B-3. Arid zones, PERSIANN.

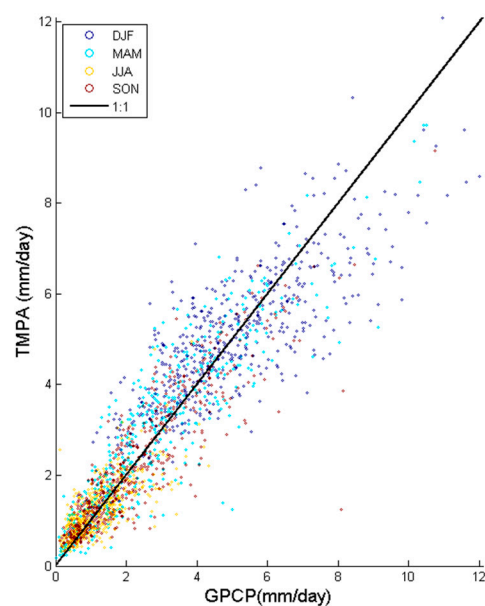

| STATISTIC              | DJF   | MAM   | JJA   | SON   | ALL   |
|------------------------|-------|-------|-------|-------|-------|
| N                      | 542   | 552   | 552   | 546   | 2192  |
| Mean SPP (mm/day)      | 5.00  | 2.67  | 1.22  | 2.17  | 2.76  |
| Mean GPCP (mm/day)     | 4.96  | 2.55  | 1.17  | 2.20  | 2.71  |
| Std. dev. SPP (mm/d... | 1.50  | 1.86  | 0.59  | 1.40  | 1.98  |
| Std. dev. SPP (mm/d... | 2.00  | 1.98  | 0.74  | 1.60  | 2.16  |
| Bias (%)               | 0.77  | 4.73  | 4.02  | -1.70 | 1.56  |
| MSE from mean          | 0.00  | 0.01  | 0.00  | 0.00  | 0.00  |
| MSE from variance      | 0.25  | 0.01  | 0.02  | 0.04  | 0.03  |
| MSE from correlation   | 1.19  | 0.62  | 0.23  | 0.49  | 0.68  |
| MSE                    | 1.44  | 0.65  | 0.25  | 0.54  | 0.72  |
| RMSE                   | 1.20  | 0.81  | 0.50  | 0.73  | 0.85  |
| Correlation coeff.     | 0.801 | 0.916 | 0.740 | 0.890 | 0.920 |
| Nash-Sutcliffe Eff.    | 0.639 | 0.835 | 0.539 | 0.791 | 0.847 |
| Max. SPP rainfall      | 12.10 | 9.73  | 4.95  | 9.15  | 12.10 |
| Max. GPCP rainfall     | 12.01 | 10.50 | 4.33  | 10.74 | 12.01 |
| Min. SPP rainfall      | 0.96  | 0.19  | 0.32  | 0.32  | 0.19  |
| Min. GPCP rainfall     | 0.64  | 0.02  | 0.12  | 0.11  | 0.02  |

Figure B-4. Warm zones, TMPA.

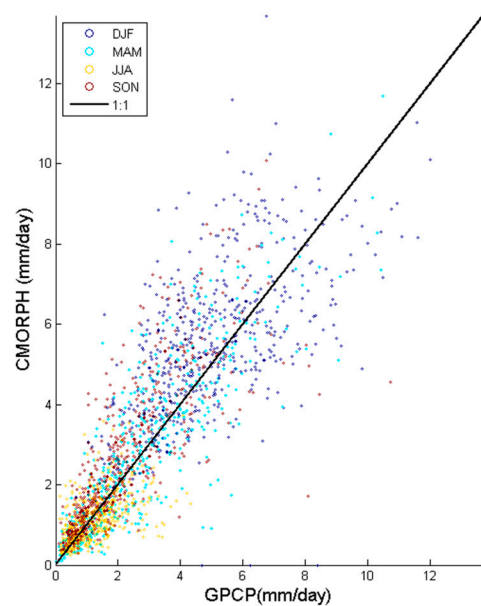

| STATISTIC              | DJF   | MAM   | JJA   | SON   | ALL   |
|------------------------|-------|-------|-------|-------|-------|
| N                      | 542   | 552   | 552   | 546   | 2192  |
| Mean SPP (mm/day)      | 5.49  | 2.64  | 1.11  | 2.67  | 2.97  |
| Mean GPCP (mm/day)     | 4.96  | 2.55  | 1.17  | 2.20  | 2.71  |
| Std. dev. SPP (mm/d... | 1.88  | 2.05  | 0.57  | 1.83  | 2.31  |
| Std. dev. SPP (mm/d... | 2.00  | 1.98  | 0.74  | 1.60  | 2.16  |
| Bias (%)               | 10.72 | 3.44  | -5.58 | 21.10 | 9.32  |
| MSE from mean          | 0.28  | 0.01  | 0.00  | 0.22  | 0.06  |
| MSE from variance      | 0.01  | 0.01  | 0.03  | 0.05  | 0.02  |
| MSE from correlation   | 2.97  | 1.04  | 0.37  | 1.18  | 1.45  |
| MSE                    | 3.26  | 1.05  | 0.41  | 1.45  | 1.53  |
| RMSE                   | 1.81  | 1.02  | 0.64  | 1.20  | 1.24  |
| Correlation coeff.     | 0.605 | 0.872 | 0.553 | 0.798 | 0.855 |
| Nash-Sutcliffe Eff.    | 0.183 | 0.732 | 0.253 | 0.434 | 0.671 |
| Max. SPP rainfall      | 13.69 | 11.69 | 3.74  | 10.07 | 13.69 |
| Max. GPCP rainfall     | 12.01 | 10.50 | 4.33  | 10.74 | 12.01 |
| Min. SPP rainfall      | 0.00  | 0.08  | 0.24  | 0.28  | 0.00  |
| Min. GPCP rainfall     | 0.64  | 0.02  | 0.12  | 0.11  | 0.02  |

Figure B-5. Warm zones, CMORPH.

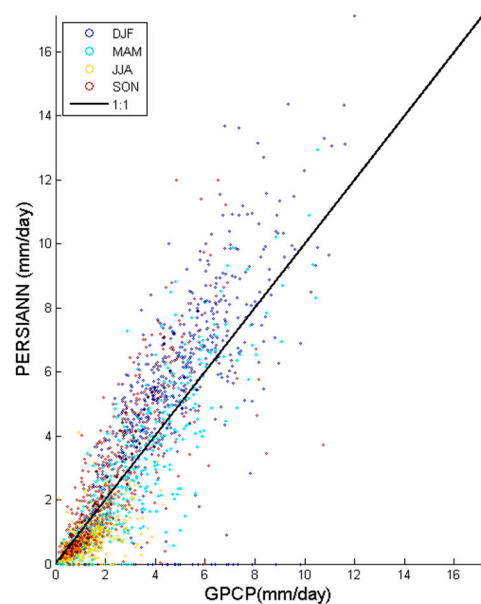

| STATISTIC              | DJF    | MAM   | JJA    | SON   | ALL   |
|------------------------|--------|-------|--------|-------|-------|
| N                      | 542    | 552   | 552    | 546   | 2192  |
| Mean SPP (mm/day)      | 5.75   | 2.32  | 0.72   | 2.55  | 2.82  |
| Mean GPCP (mm/day)     | 4.96   | 2.55  | 1.17   | 2.20  | 2.71  |
| Std. dev. SPP (mm/d... | 2.64   | 2.25  | 0.56   | 2.21  | 2.76  |
| Std. dev. SPP (mm/d... | 2.00   | 1.98  | 0.74   | 1.60  | 2.16  |
| Bias (%)               | 15.95  | -9.01 | -38.81 | 15.63 | 4.01  |
| MSE from mean          | 0.63   | 0.05  | 0.21   | 0.12  | 0.01  |
| MSE from variance      | 0.42   | 0.07  | 0.03   | 0.37  | 0.36  |
| MSE from correlation   | 3.50   | 1.03  | 0.33   | 1.39  | 1.65  |
| MSE                    | 4.54   | 1.15  | 0.57   | 1.88  | 2.02  |
| RMSE                   | 2.13   | 1.07  | 0.75   | 1.37  | 1.42  |
| Correlation coeff.     | 0.669  | 0.884 | 0.603  | 0.804 | 0.861 |
| Nash-Sutcliffe Eff.    | -0.137 | 0.706 | -0.039 | 0.265 | 0.566 |
| Max. SPP rainfall      | 17.14  | 12.93 | 4.12   | 12.00 | 17.14 |
| Max. GPCP rainfall     | 12.01  | 10.50 | 4.33   | 10.74 | 12.01 |
| Min. SPP rainfall      | 0.00   | 0.00  | 0.00   | 0.00  | 0.00  |
| Min. GPCP rainfall     | 0.64   | 0.02  | 0.12   | 0.11  | 0.02  |

Figure B-6. Warm zones, PERSIANN.

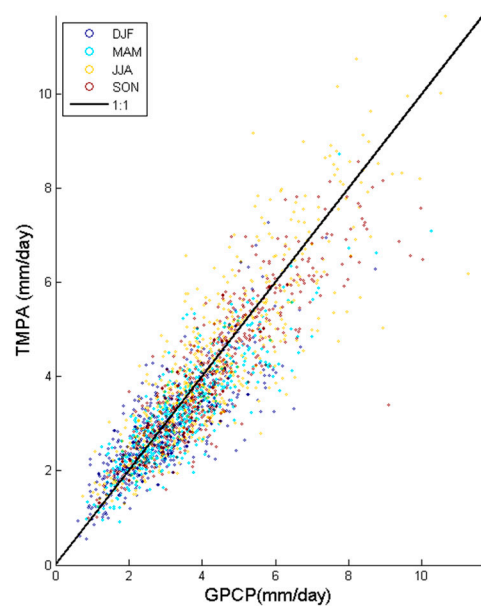

| STATISTIC              | DJF   | MAM   | JJA   | SON   | ALL   |
|------------------------|-------|-------|-------|-------|-------|
| N                      | 542   | 552   | 552   | 546   | 2192  |
| Mean SPP (mm/day)      | 2.85  | 3.21  | 4.38  | 4.04  | 3.62  |
| Mean GPCP (mm/day)     | 2.96  | 3.42  | 4.37  | 4.24  | 3.75  |
| Std. dev. SPP (mm/d... | 1.00  | 1.03  | 1.79  | 1.48  | 1.50  |
| Std. dev. SPP (mm/d... | 1.23  | 1.26  | 1.80  | 1.63  | 1.61  |
| Bias (%)               | -3.84 | -5.93 | 0.05  | -4.59 | -3.39 |
| MSE from mean          | 0.01  | 0.04  | 0.00  | 0.04  | 0.02  |
| MSE from variance      | 0.05  | 0.05  | 0.00  | 0.02  | 0.01  |
| MSE from correlation   | 0.47  | 0.36  | 0.94  | 0.53  | 0.60  |
| MSE                    | 0.54  | 0.46  | 0.94  | 0.59  | 0.63  |
| RMSE                   | 0.73  | 0.68  | 0.97  | 0.77  | 0.79  |
| Correlation coeff.     | 0.809 | 0.862 | 0.854 | 0.891 | 0.875 |
| Nash-Sutcliffe Eff.    | 0.645 | 0.715 | 0.710 | 0.780 | 0.757 |
| Max. SPP rainfall      | 7.26  | 8.73  | 11.66 | 8.55  | 11.66 |
| Max. GPCP rainfall     | 8.72  | 10.24 | 11.27 | 10.02 | 11.27 |
| Min. SPP rainfall      | 0.56  | 0.93  | 1.25  | 1.00  | 0.56  |
| Min. GPCP rainfall     | 0.62  | 0.84  | 0.74  | 0.89  | 0.62  |

Figure B-7. Tropical zones, TMPA.

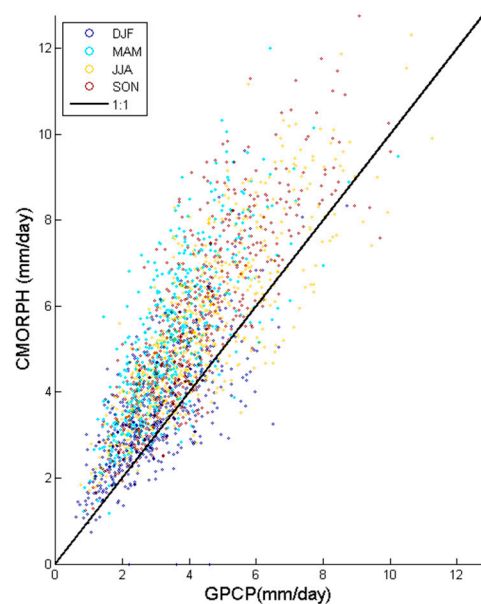

| STATISTIC              | DJF   | MAM    | JJA   | SON    | ALL    |
|------------------------|-------|--------|-------|--------|--------|
| N                      | 542   | 552    | 552   | 546    | 2192   |
| Mean SPP (mm/day)      | 3.51  | 5.14   | 5.59  | 5.68   | 4.99   |
| Mean GPCP (mm/day)     | 2.96  | 3.42   | 4.37  | 4.24   | 3.75   |
| Std. dev. SPP (mm/d... | 1.32  | 1.76   | 1.92  | 2.06   | 1.99   |
| Std. dev. SPP (mm/d... | 1.23  | 1.26   | 1.80  | 1.63   | 1.61   |
| Bias (%)               | 18.54 | 50.52  | 27.83 | 33.92  | 32.93  |
| MSE from mean          | 0.30  | 2.98   | 1.48  | 2.07   | 1.53   |
| MSE from variance      | 0.01  | 0.24   | 0.01  | 0.18   | 0.14   |
| MSE from correlation   | 0.97  | 1.10   | 1.28  | 1.18   | 1.29   |
| MSE                    | 1.28  | 4.33   | 2.78  | 3.43   | 2.96   |
| RMSE                   | 1.13  | 2.08   | 1.67  | 1.85   | 1.72   |
| Correlation coeff.     | 0.700 | 0.752  | 0.814 | 0.826  | 0.798  |
| Nash-Sutcliffe Eff.    | 0.153 | -1.707 | 0.143 | -0.286 | -0.140 |
| Max. SPP rainfall      | 9.62  | 12.00  | 12.32 | 12.77  | 12.77  |
| Max. GPCP rainfall     | 8.72  | 10.24  | 11.27 | 10.02  | 11.27  |
| Min. SPP rainfall      | 0.00  | 1.19   | 1.71  | 1.25   | 0.00   |
| Min. GPCP rainfall     | 0.62  | 0.84   | 0.74  | 0.89   | 0.62   |

Figure B-8. Tropical zones, CMORPH.

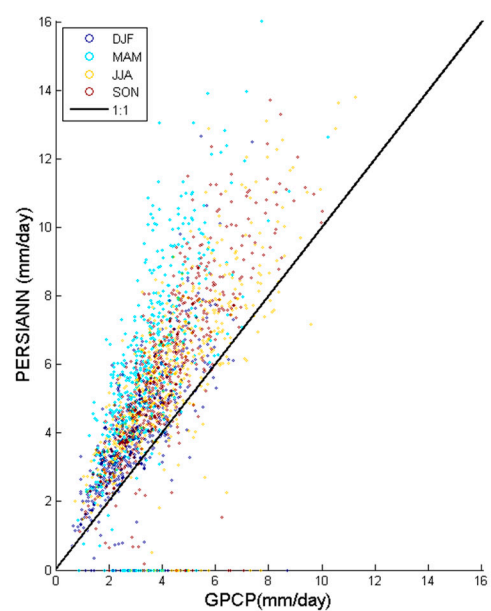

| STATISTIC              | DJF    | MAM    | JJA    | SON    | ALL    |
|------------------------|--------|--------|--------|--------|--------|
| N                      | 542    | 552    | 552    | 546    | 2192   |
| Mean SPP (mm/day)      | 3.91   | 5.68   | 5.76   | 5.83   | 5.30   |
| Mean GPCP (mm/day)     | 2.96   | 3.42   | 4.37   | 4.24   | 3.75   |
| Std. dev. SPP (mm/d... | 1.82   | 2.73   | 2.40   | 2.45   | 2.51   |
| Std. dev. SPP (mm/d... | 1.23   | 1.26   | 1.80   | 1.63   | 1.61   |
| Bias (%)               | 31.80  | 66.13  | 31.66  | 37.53  | 41.25  |
| MSE from mean          | 0.89   | 5.10   | 1.92   | 2.53   | 2.39   |
| MSE from variance      | 0.35   | 2.16   | 0.36   | 0.67   | 0.80   |
| MSE from correlation   | 1.40   | 2.25   | 2.42   | 1.71   | 2.25   |
| MSE                    | 2.63   | 9.51   | 4.69   | 4.92   | 5.45   |
| RMSE                   | 1.62   | 3.08   | 2.16   | 2.22   | 2.33   |
| Correlation coeff.     | 0.689  | 0.675  | 0.721  | 0.786  | 0.721  |
| Nash-Sutcliffe Eff.    | -0.739 | -4.950 | -0.446 | -0.844 | -1.100 |
| Max. SPP rainfall      | 12.67  | 16.05  | 13.81  | 13.72  | 16.05  |
| Max. GPCP rainfall     | 8.72   | 10.24  | 11.27  | 10.02  | 11.27  |
| Min. SPP rainfall      | 0.00   | 0.00   | 0.00   | 0.00   | 0.00   |
| Min. GPCP rainfall     | 0.62   | 0.84   | 0.74   | 0.89   | 0.62   |

**Figure B-9.** Tropical zones, PERSIANN.

## C. Raw Estimates Error Analysis for Topographic Classification Zones.

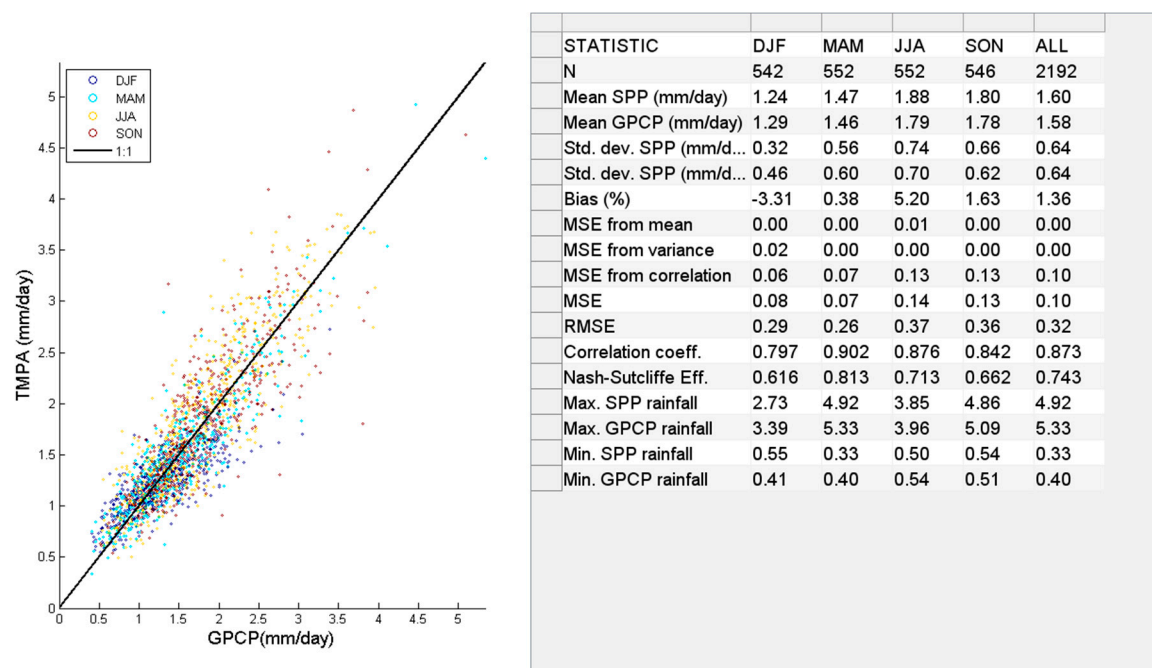

Figure C-1. Flat areas, TMPA.

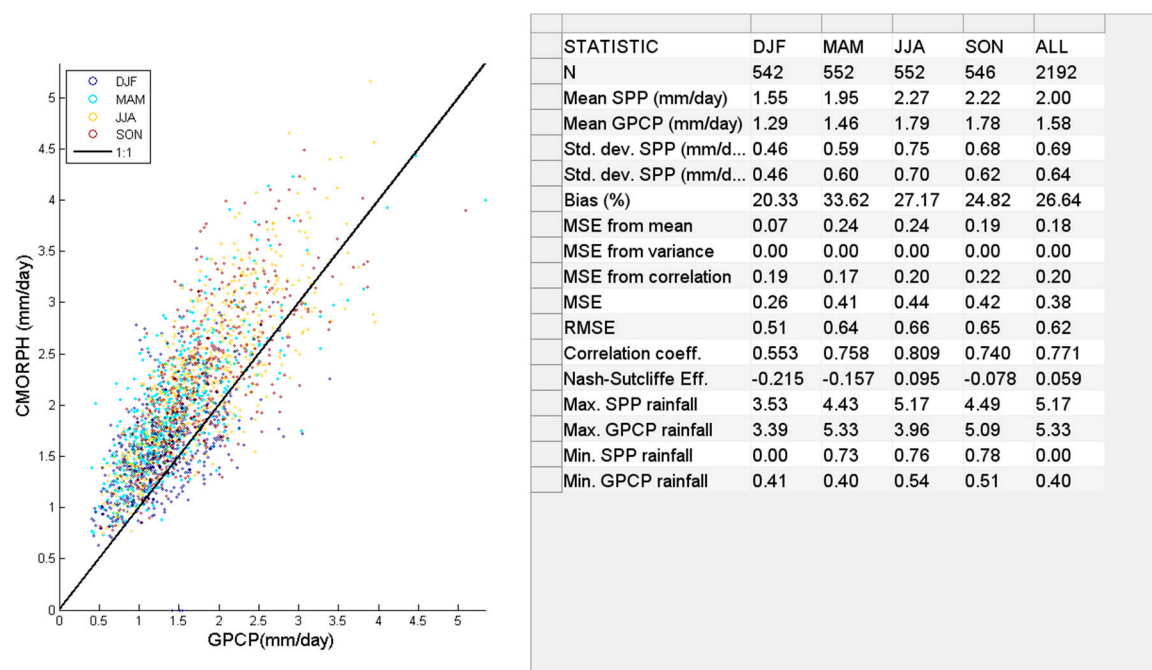

Figure C-2. Flat areas, CMORPH.



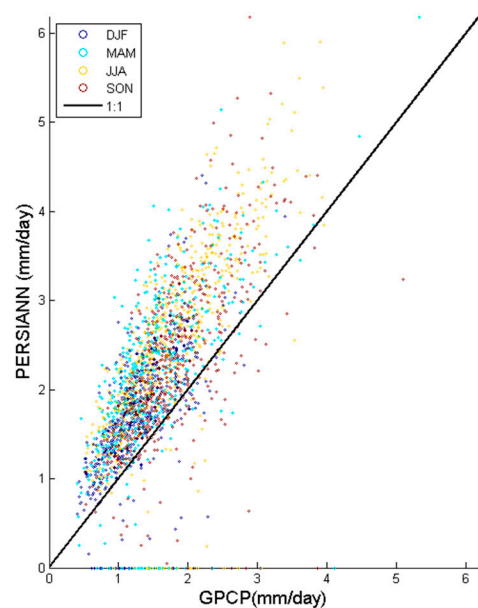

| STATISTIC              | DJF    | MAM    | JJA    | SON    | ALL    |
|------------------------|--------|--------|--------|--------|--------|
| N                      | 542    | 552    | 552    | 546    | 2192   |
| Mean SPP (mm/day)      | 1.71   | 2.06   | 2.55   | 2.30   | 2.16   |
| Mean GPCP (mm/day)     | 1.29   | 1.46   | 1.79   | 1.78   | 1.58   |
| Std. dev. SPP (mm/d... | 0.70   | 0.92   | 1.03   | 0.93   | 0.95   |
| Std. dev. SPP (mm/d... | 0.46   | 0.60   | 0.70   | 0.62   | 0.64   |
| Bias (%)               | 33.37  | 41.18  | 42.29  | 29.26  | 36.59  |
| MSE from mean          | 0.18   | 0.36   | 0.57   | 0.27   | 0.33   |
| MSE from variance      | 0.06   | 0.10   | 0.11   | 0.09   | 0.10   |
| MSE from correlation   | 0.28   | 0.43   | 0.38   | 0.42   | 0.38   |
| MSE                    | 0.52   | 0.89   | 1.06   | 0.78   | 0.81   |
| RMSE                   | 0.72   | 0.94   | 1.03   | 0.88   | 0.90   |
| Correlation coeff.     | 0.570  | 0.609  | 0.735  | 0.639  | 0.685  |
| Nash-Sutcliffe Eff.    | -1.428 | -1.498 | -1.206 | -1.002 | -1.003 |
| Max. SPP rainfall      | 4.41   | 6.18   | 5.91   | 6.18   | 6.18   |
| Max. GPCP rainfall     | 3.39   | 5.33   | 3.96   | 5.09   | 5.33   |
| Min. SPP rainfall      | 0.00   | 0.00   | 0.00   | 0.00   | 0.00   |
| Min. GPCP rainfall     | 0.41   | 0.40   | 0.54   | 0.51   | 0.40   |

Figure C-3. Flat areas, PERSIANN.

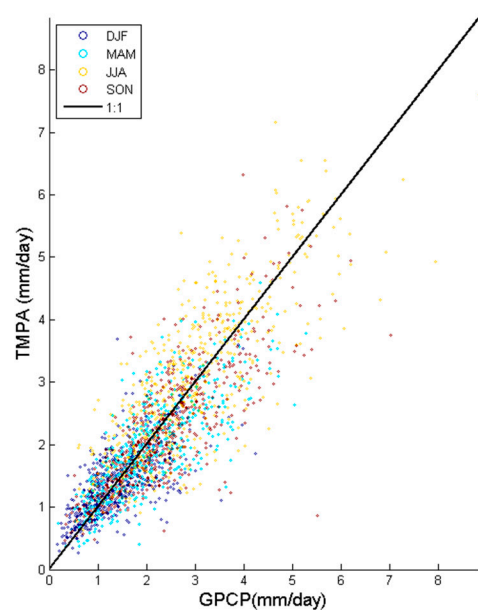

| STATISTIC              | DJF   | MAM   | JJA   | SON   | ALL   |
|------------------------|-------|-------|-------|-------|-------|
| N                      | 542   | 552   | 552   | 546   | 2192  |
| Mean SPP (mm/day)      | 1.37  | 1.89  | 3.05  | 2.24  | 2.14  |
| Mean GPCP (mm/day)     | 1.38  | 2.01  | 2.94  | 2.39  | 2.18  |
| Std. dev. SPP (mm/d... | 0.55  | 0.75  | 1.20  | 0.95  | 1.08  |
| Std. dev. SPP (mm/d... | 0.68  | 0.91  | 1.24  | 1.07  | 1.15  |
| Bias (%)               | -0.24 | -6.13 | 3.78  | -5.96 | -1.80 |
| MSE from mean          | 0.00  | 0.02  | 0.01  | 0.02  | 0.00  |
| MSE from variance      | 0.02  | 0.02  | 0.00  | 0.01  | 0.00  |
| MSE from correlation   | 0.23  | 0.28  | 0.62  | 0.41  | 0.41  |
| MSE                    | 0.25  | 0.32  | 0.64  | 0.44  | 0.41  |
| RMSE                   | 0.50  | 0.56  | 0.80  | 0.67  | 0.64  |
| Correlation coeff.     | 0.691 | 0.795 | 0.792 | 0.800 | 0.837 |
| Nash-Sutcliffe Eff.    | 0.465 | 0.613 | 0.589 | 0.615 | 0.688 |
| Max. SPP rainfall      | 3.70  | 4.60  | 7.60  | 6.32  | 7.60  |
| Max. GPCP rainfall     | 4.24  | 5.28  | 8.83  | 7.02  | 8.83  |
| Min. SPP rainfall      | 0.27  | 0.38  | 0.64  | 0.47  | 0.27  |
| Min. GPCP rainfall     | 0.16  | 0.19  | 0.57  | 0.33  | 0.16  |

Figure C-4. Mountainous areas, TMPA.

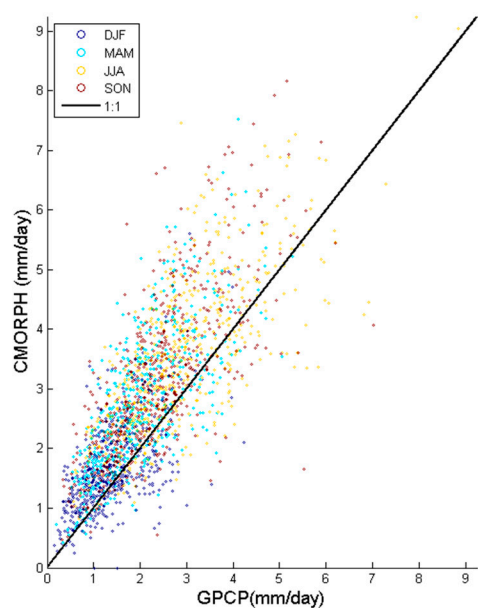

| STATISTIC              | DJF    | MAM    | JJA   | SON    | ALL   |
|------------------------|--------|--------|-------|--------|-------|
| N                      | 542    | 552    | 552   | 546    | 2192  |
| Mean SPP (mm/day)      | 1.68   | 2.75   | 3.62  | 3.18   | 2.81  |
| Mean GPCP (mm/day)     | 1.38   | 2.01   | 2.94  | 2.39   | 2.18  |
| Std. dev. SPP (mm/d... | 0.75   | 1.14   | 1.29  | 1.34   | 1.36  |
| Std. dev. SPP (mm/d... | 0.68   | 0.91   | 1.24  | 1.07   | 1.15  |
| Bias (%)               | 22.02  | 36.84  | 23.22 | 33.16  | 28.90 |
| MSE from mean          | 0.09   | 0.55   | 0.47  | 0.63   | 0.40  |
| MSE from variance      | 0.00   | 0.06   | 0.00  | 0.07   | 0.04  |
| MSE from correlation   | 0.41   | 0.56   | 0.90  | 0.78   | 0.69  |
| MSE                    | 0.51   | 1.17   | 1.37  | 1.48   | 1.13  |
| RMSE                   | 0.71   | 1.08   | 1.17  | 1.21   | 1.06  |
| Correlation coeff.     | 0.601  | 0.728  | 0.719 | 0.728  | 0.779 |
| Nash-Sutcliffe Eff.    | -0.088 | -0.426 | 0.112 | -0.282 | 0.142 |
| Max. SPP rainfall      | 5.60   | 7.52   | 9.24  | 8.16   | 9.24  |
| Max. GPCP rainfall     | 4.24   | 5.28   | 8.83  | 7.02   | 8.83  |
| Min. SPP rainfall      | 0.00   | 0.43   | 0.82  | 0.47   | 0.00  |
| Min. GPCP rainfall     | 0.16   | 0.19   | 0.57  | 0.33   | 0.16  |

Figure C-5. Mountainous areas, TMPA.

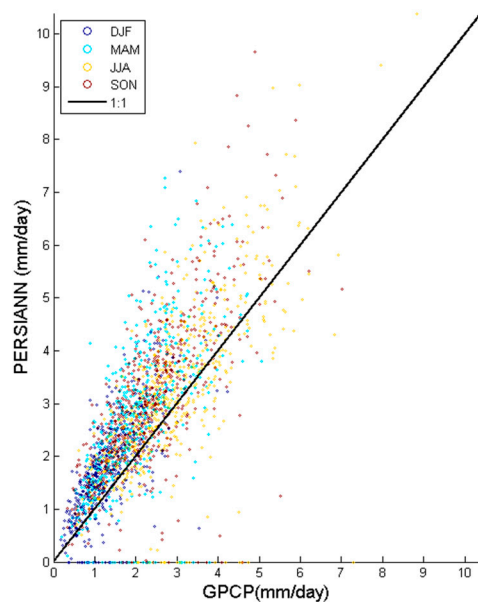

| STATISTIC              | DJF    | MAM    | JJA   | SON    | ALL    |
|------------------------|--------|--------|-------|--------|--------|
| N                      | 542    | 552    | 552   | 546    | 2192   |
| Mean SPP (mm/day)      | 1.85   | 2.68   | 3.25  | 3.08   | 2.72   |
| Mean GPCP (mm/day)     | 1.38   | 2.01   | 2.94  | 2.39   | 2.18   |
| Std. dev. SPP (mm/d... | 0.98   | 1.42   | 1.56  | 1.45   | 1.47   |
| Std. dev. SPP (mm/d... | 0.68   | 0.91   | 1.24  | 1.07   | 1.15   |
| Bias (%)               | 33.96  | 33.23  | 10.62 | 29.19  | 24.57  |
| MSE from mean          | 0.22   | 0.45   | 0.10  | 0.49   | 0.29   |
| MSE from variance      | 0.09   | 0.27   | 0.10  | 0.14   | 0.11   |
| MSE from correlation   | 0.37   | 0.94   | 1.21  | 0.93   | 0.93   |
| MSE                    | 0.67   | 1.65   | 1.40  | 1.56   | 1.32   |
| RMSE                   | 0.82   | 1.28   | 1.18  | 1.25   | 1.15   |
| Correlation coeff.     | 0.726  | 0.635  | 0.689 | 0.700  | 0.725  |
| Nash-Sutcliffe Eff.    | -0.443 | -1.019 | 0.092 | -0.356 | -0.004 |
| Max. SPP rainfall      | 7.40   | 7.26   | 10.39 | 9.66   | 10.39  |
| Max. GPCP rainfall     | 4.24   | 5.28   | 8.83  | 7.02   | 8.83   |
| Min. SPP rainfall      | 0.00   | 0.00   | 0.00  | 0.00   | 0.00   |
| Min. GPCP rainfall     | 0.16   | 0.19   | 0.57  | 0.33   | 0.16   |

Figure C-6. Mountainous areas, PERSIANN.



**D. Bias Corrected Estimates Error Analysis for Latitudinal Bands.**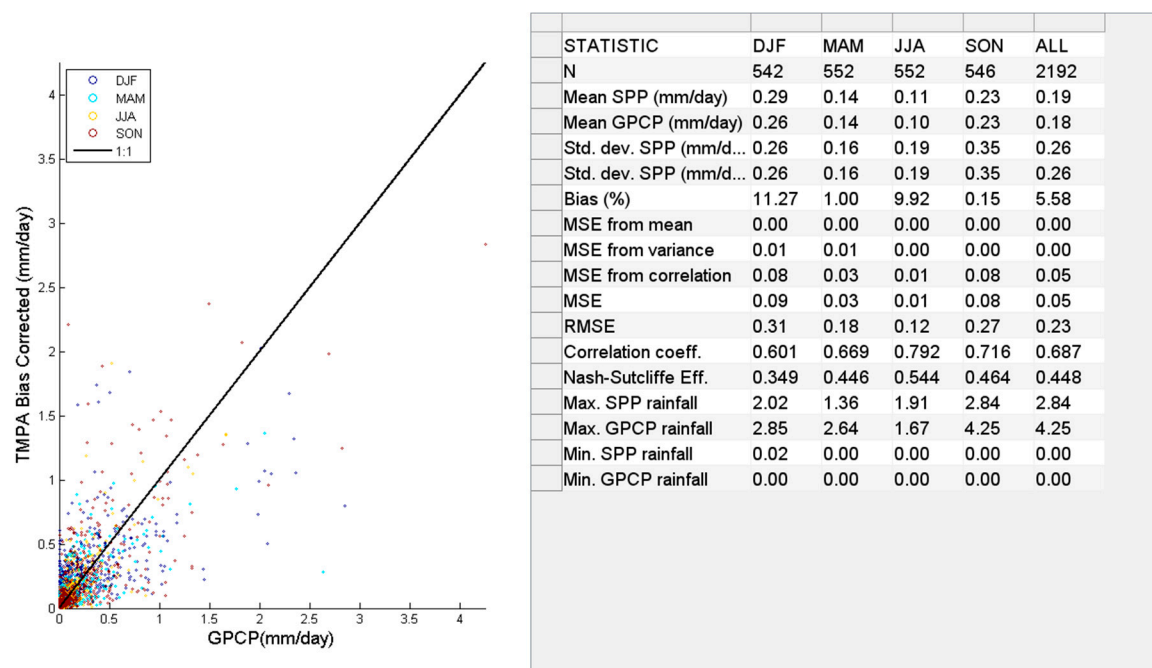**Figure D-1.** TMPA Band A, Bias corrected.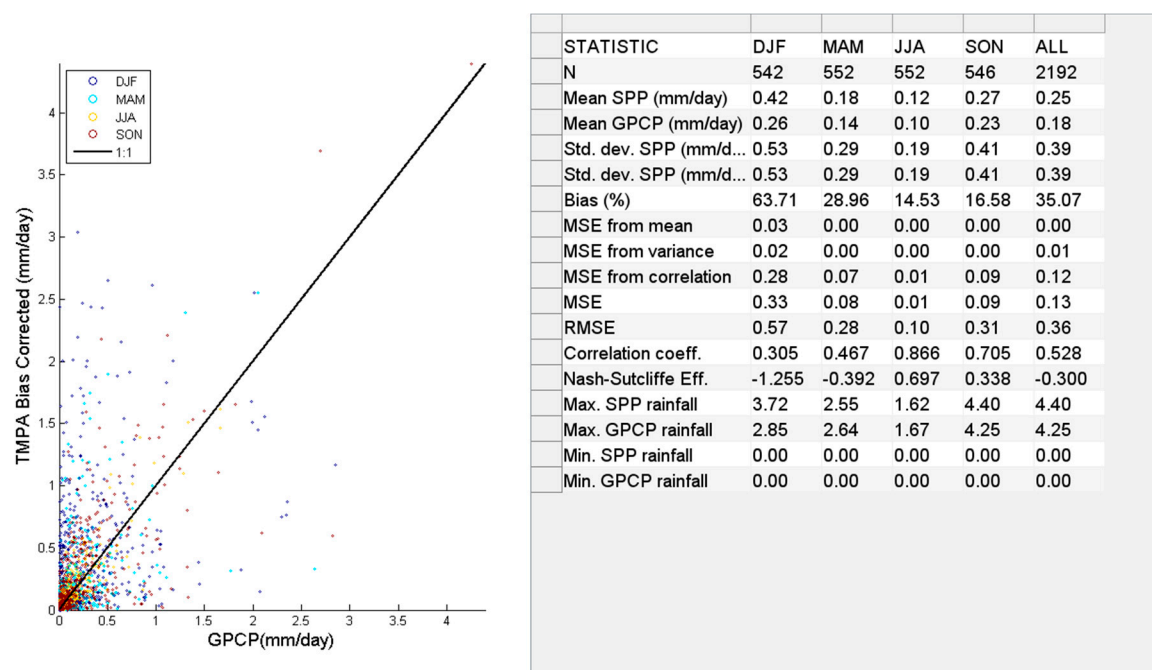**Figure D-2.** CMORPH band A, bias corrected.

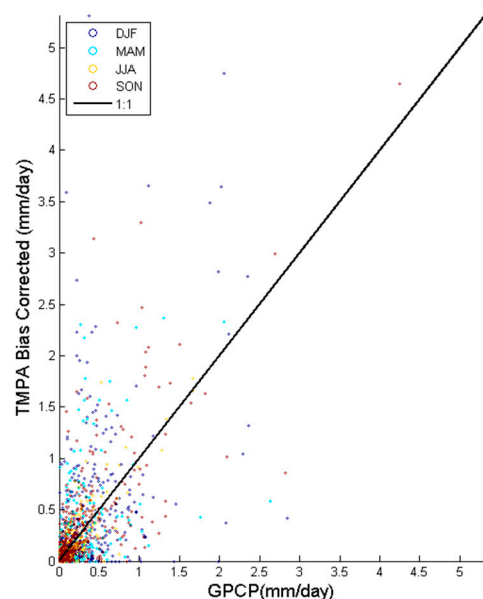

| STATISTIC              | DJF    | MAM    | JJA   | SON   | ALL    |
|------------------------|--------|--------|-------|-------|--------|
| N                      | 542    | 552    | 552   | 546   | 2192   |
| Mean SPP (mm/day)      | 0.31   | 0.16   | 0.10  | 0.26  | 0.21   |
| Mean GPCP (mm/day)     | 0.26   | 0.14   | 0.10  | 0.23  | 0.18   |
| Std. dev. SPP (mm/d... | 0.63   | 0.34   | 0.21  | 0.47  | 0.45   |
| Std. dev. SPP (mm/d... | 0.63   | 0.34   | 0.21  | 0.47  | 0.45   |
| Bias (%)               | 22.02  | 14.79  | -1.38 | 13.44 | 14.57  |
| MSE from mean          | 0.00   | 0.00   | 0.00  | 0.00  | 0.00   |
| MSE from variance      | 0.06   | 0.01   | 0.00  | 0.01  | 0.02   |
| MSE from correlation   | 0.24   | 0.08   | 0.01  | 0.10  | 0.11   |
| MSE                    | 0.31   | 0.09   | 0.01  | 0.11  | 0.13   |
| RMSE                   | 0.55   | 0.29   | 0.11  | 0.33  | 0.36   |
| Correlation coeff.     | 0.491  | 0.529  | 0.841 | 0.721 | 0.608  |
| Nash-Sutcliffe Eff.    | -1.106 | -0.531 | 0.604 | 0.236 | -0.309 |
| Max. SPP rainfall      | 5.31   | 2.36   | 1.78  | 4.65  | 5.31   |
| Max. GPCP rainfall     | 2.85   | 2.64   | 1.67  | 4.25  | 4.25   |
| Min. SPP rainfall      | 0.00   | 0.00   | 0.00  | 0.00  | 0.00   |
| Min. GPCP rainfall     | 0.00   | 0.00   | 0.00  | 0.00  | 0.00   |

Figure D-3. PERSIANN band A, bias corrected.

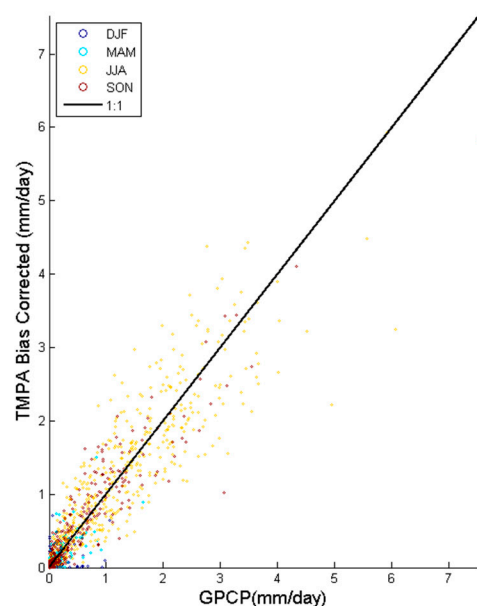

| STATISTIC              | DJF    | MAM   | JJA   | SON   | ALL   |
|------------------------|--------|-------|-------|-------|-------|
| N                      | 542    | 552   | 552   | 546   | 2192  |
| Mean SPP (mm/day)      | 0.03   | 0.06  | 1.15  | 0.33  | 0.39  |
| Mean GPCP (mm/day)     | 0.03   | 0.06  | 1.14  | 0.32  | 0.39  |
| Std. dev. SPP (mm/d... | 0.06   | 0.13  | 1.00  | 0.58  | 0.74  |
| Std. dev. SPP (mm/d... | 0.06   | 0.13  | 1.00  | 0.58  | 0.74  |
| Bias (%)               | -17.16 | 2.65  | 1.06  | 3.35  | 1.19  |
| MSE from mean          | 0.00   | 0.00  | 0.00  | 0.00  | 0.00  |
| MSE from variance      | 0.00   | 0.00  | 0.01  | 0.00  | 0.00  |
| MSE from correlation   | 0.01   | 0.01  | 0.23  | 0.05  | 0.07  |
| MSE                    | 0.01   | 0.01  | 0.23  | 0.05  | 0.08  |
| RMSE                   | 0.11   | 0.10  | 0.48  | 0.22  | 0.27  |
| Correlation coeff.     | 0.318  | 0.719 | 0.895 | 0.931 | 0.934 |
| Nash-Sutcliffe Eff.    | 0.027  | 0.469 | 0.799 | 0.864 | 0.871 |
| Max. SPP rainfall      | 0.71   | 1.50  | 5.93  | 4.11  | 5.93  |
| Max. GPCP rainfall     | 1.06   | 1.64  | 7.52  | 4.34  | 7.52  |
| Min. SPP rainfall      | 0.00   | 0.00  | 0.00  | 0.00  | 0.00  |
| Min. GPCP rainfall     | 0.00   | 0.00  | 0.00  | 0.00  | 0.00  |

Figure D-4. TMPA band B, bias corrected.

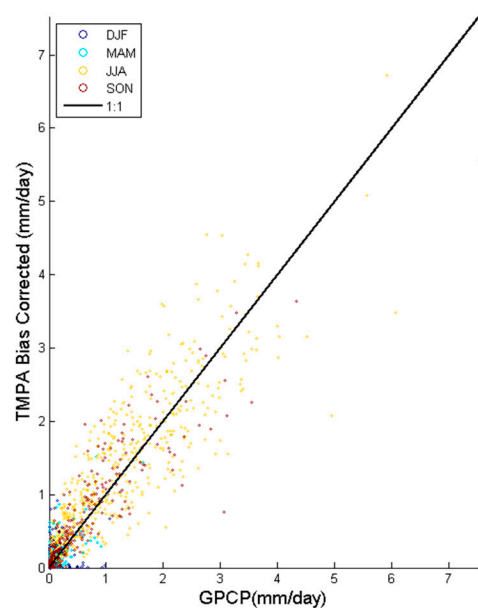

| STATISTIC              | DJF    | MAM   | JJA   | SON   | ALL   |
|------------------------|--------|-------|-------|-------|-------|
| N                      | 542    | 552   | 552   | 546   | 2192  |
| Mean SPP (mm/day)      | 0.04   | 0.08  | 1.24  | 0.35  | 0.43  |
| Mean GPCP (mm/day)     | 0.03   | 0.06  | 1.14  | 0.32  | 0.39  |
| Std. dev. SPP (mm/d... | 0.10   | 0.15  | 1.02  | 0.58  | 0.77  |
| Std. dev. SPP (mm/d... | 0.10   | 0.15  | 1.02  | 0.58  | 0.77  |
| Bias (%)               | 22.60  | 30.68 | 9.43  | 9.50  | 10.58 |
| MSE from mean          | 0.00   | 0.00  | 0.01  | 0.00  | 0.00  |
| MSE from variance      | 0.00   | 0.00  | 0.00  | 0.00  | 0.00  |
| MSE from correlation   | 0.02   | 0.01  | 0.28  | 0.06  | 0.09  |
| MSE                    | 0.02   | 0.01  | 0.29  | 0.07  | 0.10  |
| RMSE                   | 0.13   | 0.12  | 0.54  | 0.25  | 0.31  |
| Correlation coeff.     | 0.195  | 0.698 | 0.875 | 0.908 | 0.920 |
| Nash-Sutcliffe Eff.    | -0.465 | 0.304 | 0.749 | 0.818 | 0.835 |
| Max. SPP rainfall      | 0.92   | 1.52  | 6.73  | 3.63  | 6.73  |
| Max. GPCP rainfall     | 1.06   | 1.64  | 7.52  | 4.34  | 7.52  |
| Min. SPP rainfall      | 0.00   | 0.00  | 0.00  | 0.00  | 0.00  |
| Min. GPCP rainfall     | 0.00   | 0.00  | 0.00  | 0.00  | 0.00  |

Figure D-5. CMORPH band B, bias corrected.

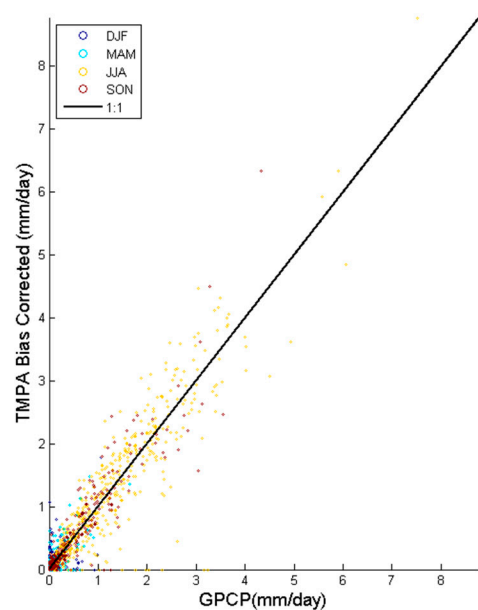

| STATISTIC              | DJF    | MAM   | JJA   | SON   | ALL   |
|------------------------|--------|-------|-------|-------|-------|
| N                      | 542    | 552   | 552   | 546   | 2192  |
| Mean SPP (mm/day)      | 0.04   | 0.06  | 1.13  | 0.33  | 0.39  |
| Mean GPCP (mm/day)     | 0.03   | 0.06  | 1.14  | 0.32  | 0.39  |
| Std. dev. SPP (mm/d... | 0.12   | 0.16  | 1.12  | 0.64  | 0.79  |
| Std. dev. SPP (mm/d... | 0.12   | 0.16  | 1.12  | 0.64  | 0.79  |
| Bias (%)               | 13.44  | 3.86  | -0.81 | 2.44  | 0.36  |
| MSE from mean          | 0.00   | 0.00  | 0.00  | 0.00  | 0.00  |
| MSE from variance      | 0.00   | 0.00  | 0.00  | 0.00  | 0.00  |
| MSE from correlation   | 0.02   | 0.01  | 0.21  | 0.05  | 0.07  |
| MSE                    | 0.02   | 0.01  | 0.21  | 0.05  | 0.07  |
| RMSE                   | 0.13   | 0.11  | 0.46  | 0.22  | 0.27  |
| Correlation coeff.     | 0.389  | 0.746 | 0.914 | 0.937 | 0.941 |
| Nash-Sutcliffe Eff.    | -0.439 | 0.417 | 0.817 | 0.859 | 0.876 |
| Max. SPP rainfall      | 1.78   | 1.48  | 8.77  | 6.34  | 8.77  |
| Max. GPCP rainfall     | 1.06   | 1.64  | 7.52  | 4.34  | 7.52  |
| Min. SPP rainfall      | 0.00   | 0.00  | 0.00  | 0.00  | 0.00  |
| Min. GPCP rainfall     | 0.00   | 0.00  | 0.00  | 0.00  | 0.00  |

Figure D-6. PERSIANN band B, bias corrected.

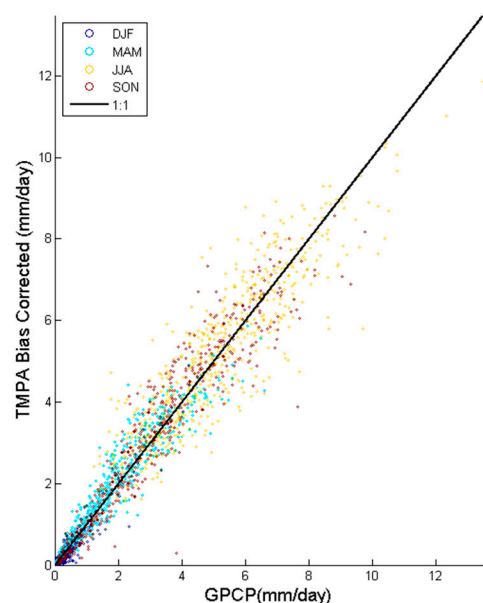

| STATISTIC              | DJF   | MAM   | JJA   | SON   | ALL   |
|------------------------|-------|-------|-------|-------|-------|
| N                      | 542   | 552   | 552   | 546   | 2192  |
| Mean SPP (mm/day)      | 0.22  | 2.00  | 5.24  | 3.03  | 2.63  |
| Mean GPCP (mm/day)     | 0.24  | 1.93  | 5.19  | 2.97  | 2.59  |
| Std. dev. SPP (mm/d... | 0.25  | 1.27  | 1.85  | 2.12  | 2.39  |
| Std. dev. SPP (mm/d... | 0.25  | 1.27  | 1.85  | 2.12  | 2.39  |
| Bias (%)               | -8.85 | 3.93  | 0.98  | 1.95  | 1.58  |
| MSE from mean          | 0.00  | 0.01  | 0.00  | 0.00  | 0.00  |
| MSE from variance      | 0.00  | 0.00  | 0.02  | 0.00  | 0.00  |
| MSE from correlation   | 0.02  | 0.19  | 0.87  | 0.39  | 0.38  |
| MSE                    | 0.02  | 0.20  | 0.89  | 0.39  | 0.38  |
| RMSE                   | 0.14  | 0.45  | 0.94  | 0.63  | 0.61  |
| Correlation coeff.     | 0.878 | 0.944 | 0.882 | 0.957 | 0.967 |
| Nash-Sutcliffe Eff.    | 0.765 | 0.887 | 0.776 | 0.912 | 0.935 |
| Max. SPP rainfall      | 1.85  | 5.87  | 11.86 | 8.56  | 11.86 |
| Max. GPCP rainfall     | 2.32  | 6.60  | 13.48 | 9.75  | 13.48 |
| Min. SPP rainfall      | 0.01  | 0.03  | 1.58  | 0.04  | 0.01  |
| Min. GPCP rainfall     | 0.00  | 0.00  | 1.22  | 0.03  | 0.00  |

Figure D-7. TMPA band c, bias corrected.

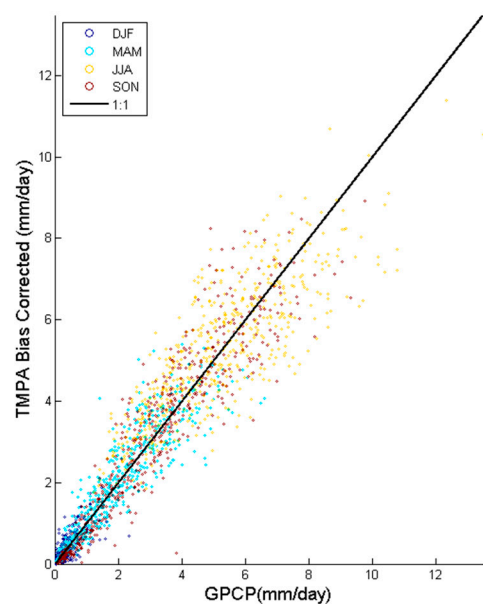

| STATISTIC              | DJF   | MAM   | JJA   | SON   | ALL   |
|------------------------|-------|-------|-------|-------|-------|
| N                      | 542   | 552   | 552   | 546   | 2192  |
| Mean SPP (mm/day)      | 0.27  | 1.97  | 5.25  | 2.98  | 2.63  |
| Mean GPCP (mm/day)     | 0.24  | 1.93  | 5.19  | 2.97  | 2.59  |
| Std. dev. SPP (mm/d... | 0.29  | 1.28  | 1.63  | 2.18  | 2.35  |
| Std. dev. SPP (mm/d... | 0.29  | 1.28  | 1.63  | 2.18  | 2.35  |
| Bias (%)               | 12.43 | 2.14  | 1.09  | 0.37  | 1.34  |
| MSE from mean          | 0.00  | 0.00  | 0.00  | 0.00  | 0.00  |
| MSE from variance      | 0.00  | 0.00  | 0.13  | 0.00  | 0.00  |
| MSE from correlation   | 0.04  | 0.33  | 1.17  | 0.57  | 0.56  |
| MSE                    | 0.04  | 0.34  | 1.31  | 0.57  | 0.57  |
| RMSE                   | 0.20  | 0.58  | 1.14  | 0.75  | 0.75  |
| Correlation coeff.     | 0.779 | 0.903 | 0.820 | 0.939 | 0.950 |
| Nash-Sutcliffe Eff.    | 0.545 | 0.810 | 0.671 | 0.873 | 0.903 |
| Max. SPP rainfall      | 1.89  | 5.40  | 11.39 | 8.92  | 11.39 |
| Max. GPCP rainfall     | 2.32  | 6.60  | 13.48 | 9.75  | 13.48 |
| Min. SPP rainfall      | 0.00  | 0.04  | 1.76  | 0.02  | 0.00  |
| Min. GPCP rainfall     | 0.00  | 0.00  | 1.22  | 0.03  | 0.00  |

Figure D-8. CMORPH band C, bias corrected.

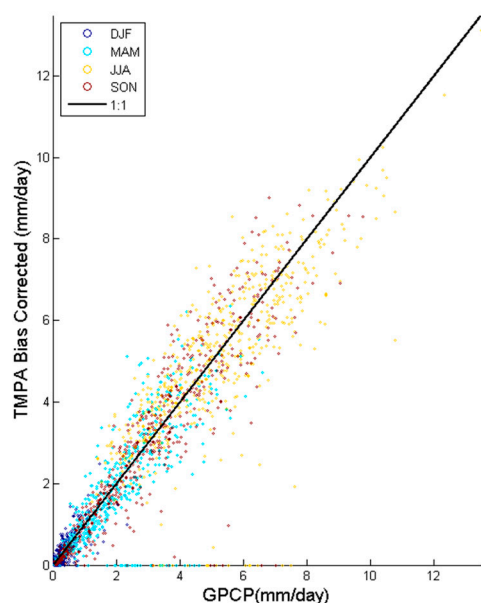

| STATISTIC              | DJF   | MAM   | JJA   | SON   | ALL   |
|------------------------|-------|-------|-------|-------|-------|
| N                      | 542   | 552   | 552   | 546   | 2192  |
| Mean SPP (mm/day)      | 0.24  | 1.77  | 5.05  | 2.89  | 2.50  |
| Mean GPCP (mm/day)     | 0.24  | 1.93  | 5.19  | 2.97  | 2.59  |
| Std. dev. SPP (mm/d... | 0.31  | 1.42  | 1.99  | 2.22  | 2.42  |
| Std. dev. SPP (mm/d... | 0.31  | 1.42  | 1.99  | 2.22  | 2.42  |
| Bias (%)               | -3.36 | -8.05 | -2.69 | -2.55 | -3.67 |
| MSE from mean          | 0.00  | 0.02  | 0.02  | 0.01  | 0.01  |
| MSE from variance      | 0.00  | 0.01  | 0.00  | 0.01  | 0.00  |
| MSE from correlation   | 0.04  | 0.80  | 1.95  | 0.89  | 0.93  |
| MSE                    | 0.04  | 0.84  | 1.97  | 0.90  | 0.94  |
| RMSE                   | 0.20  | 0.91  | 1.40  | 0.95  | 0.97  |
| Correlation coeff.     | 0.780 | 0.787 | 0.755 | 0.906 | 0.920 |
| Nash-Sutcliffe Eff.    | 0.522 | 0.527 | 0.507 | 0.798 | 0.838 |
| Max. SPP rainfall      | 2.48  | 6.36  | 13.12 | 9.02  | 13.12 |
| Max. GPCP rainfall     | 2.32  | 6.60  | 13.48 | 9.75  | 13.48 |
| Min. SPP rainfall      | 0.00  | 0.00  | 0.00  | 0.00  | 0.00  |
| Min. GPCP rainfall     | 0.00  | 0.00  | 1.22  | 0.03  | 0.00  |

Figure D-9. PERSIANN band C, bias corrected.

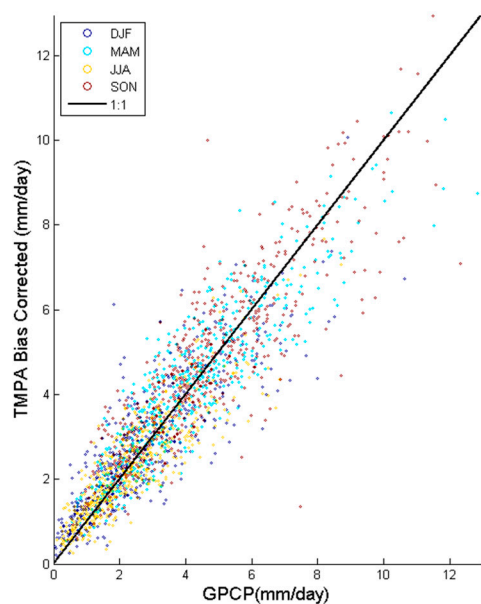

| STATISTIC              | DJF   | MAM   | JJA   | SON   | ALL   |
|------------------------|-------|-------|-------|-------|-------|
| N                      | 542   | 552   | 552   | 546   | 2192  |
| Mean SPP (mm/day)      | 2.68  | 4.08  | 2.30  | 4.70  | 3.44  |
| Mean GPCP (mm/day)     | 2.64  | 4.02  | 2.35  | 4.60  | 3.40  |
| Std. dev. SPP (mm/d... | 1.53  | 1.84  | 1.21  | 2.04  | 1.95  |
| Std. dev. SPP (mm/d... | 1.53  | 1.84  | 1.21  | 2.04  | 1.95  |
| Bias (%)               | 1.60  | 1.39  | -2.26 | 2.29  | 1.10  |
| MSE from mean          | 0.00  | 0.00  | 0.00  | 0.01  | 0.00  |
| MSE from variance      | 0.06  | 0.06  | 0.05  | 0.03  | 0.03  |
| MSE from correlation   | 0.77  | 0.73  | 0.43  | 1.15  | 0.79  |
| MSE                    | 0.84  | 0.79  | 0.48  | 1.19  | 0.82  |
| RMSE                   | 0.91  | 0.89  | 0.69  | 1.09  | 0.91  |
| Correlation coeff.     | 0.859 | 0.904 | 0.877 | 0.872 | 0.904 |
| Nash-Sutcliffe Eff.    | 0.737 | 0.817 | 0.767 | 0.755 | 0.816 |
| Max. SPP rainfall      | 10.06 | 10.64 | 7.67  | 12.95 | 12.95 |
| Max. GPCP rainfall     | 10.62 | 12.85 | 8.70  | 12.33 | 12.85 |
| Min. SPP rainfall      | 0.18  | 0.54  | 0.27  | 0.62  | 0.18  |
| Min. GPCP rainfall     | 0.06  | 0.39  | 0.10  | 0.59  | 0.06  |

Figure D-10. TMPA band D, bias corrected.



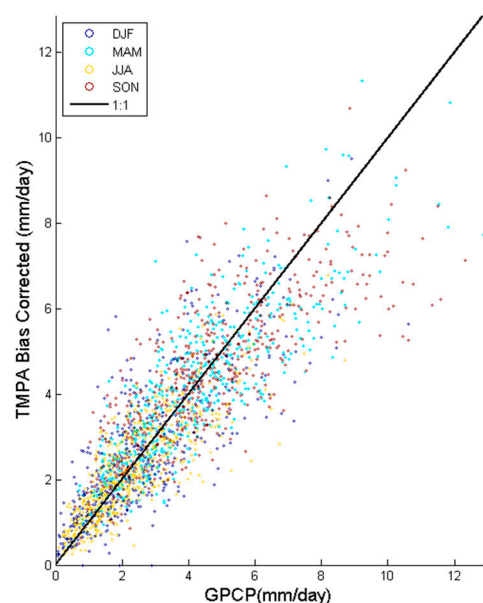

| STATISTIC              | DJF   | MAM   | JJA   | SON   | ALL   |
|------------------------|-------|-------|-------|-------|-------|
| N                      | 542   | 552   | 552   | 546   | 2192  |
| Mean SPP (mm/day)      | 2.66  | 3.97  | 2.27  | 4.45  | 3.34  |
| Mean GPCP (mm/day)     | 2.64  | 4.02  | 2.35  | 4.60  | 3.40  |
| Std. dev. SPP (mm/d... | 1.61  | 1.77  | 1.19  | 1.68  | 1.82  |
| Std. dev. SPP (mm/d... | 1.61  | 1.77  | 1.19  | 1.68  | 1.82  |
| Bias (%)               | 0.85  | -1.20 | -3.20 | -3.17 | -1.82 |
| MSE from mean          | 0.00  | 0.00  | 0.01  | 0.02  | 0.00  |
| MSE from variance      | 0.03  | 0.09  | 0.06  | 0.28  | 0.09  |
| MSE from correlation   | 1.19  | 1.09  | 0.60  | 1.62  | 1.15  |
| MSE                    | 1.22  | 1.19  | 0.66  | 1.92  | 1.24  |
| RMSE                   | 1.10  | 1.09  | 0.81  | 1.38  | 1.11  |
| Correlation coeff.     | 0.794 | 0.850 | 0.826 | 0.782 | 0.850 |
| Nash-Sutcliffe Eff.    | 0.618 | 0.723 | 0.679 | 0.606 | 0.722 |
| Max. SPP rainfall      | 9.50  | 11.33 | 6.77  | 10.68 | 11.33 |
| Max. GPCP rainfall     | 10.62 | 12.85 | 8.70  | 12.33 | 12.85 |
| Min. SPP rainfall      | 0.00  | 0.44  | 0.24  | 0.50  | 0.00  |
| Min. GPCP rainfall     | 0.06  | 0.39  | 0.10  | 0.59  | 0.06  |

Figure D-11. CMORPH band D, bias corrected.

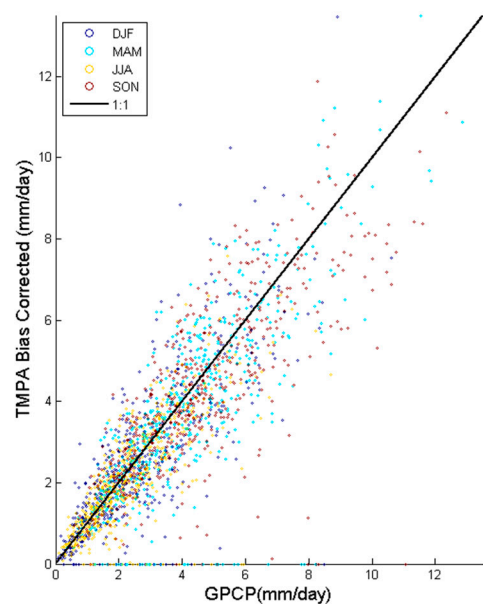

| STATISTIC              | DJF   | MAM   | JJA   | SON   | ALL   |
|------------------------|-------|-------|-------|-------|-------|
| N                      | 542   | 552   | 552   | 546   | 2192  |
| Mean SPP (mm/day)      | 2.52  | 3.68  | 2.13  | 4.25  | 3.14  |
| Mean GPCP (mm/day)     | 2.64  | 4.02  | 2.35  | 4.60  | 3.40  |
| Std. dev. SPP (mm/d... | 1.93  | 2.21  | 1.36  | 2.08  | 2.10  |
| Std. dev. SPP (mm/d... | 1.93  | 2.21  | 1.36  | 2.08  | 2.10  |
| Bias (%)               | -4.61 | -8.47 | -9.51 | -7.50 | -7.59 |
| MSE from mean          | 0.01  | 0.12  | 0.05  | 0.12  | 0.07  |
| MSE from variance      | 0.02  | 0.02  | 0.01  | 0.02  | 0.00  |
| MSE from correlation   | 1.40  | 1.99  | 0.84  | 2.30  | 1.65  |
| MSE                    | 1.44  | 2.12  | 0.90  | 2.44  | 1.72  |
| RMSE                   | 1.20  | 1.45  | 0.95  | 1.56  | 1.31  |
| Correlation coeff.     | 0.796 | 0.783 | 0.784 | 0.749 | 0.814 |
| Nash-Sutcliffe Eff.    | 0.548 | 0.507 | 0.565 | 0.499 | 0.615 |
| Max. SPP rainfall      | 13.46 | 13.50 | 7.57  | 11.88 | 13.50 |
| Max. GPCP rainfall     | 10.62 | 12.85 | 8.70  | 12.33 | 12.85 |
| Min. SPP rainfall      | 0.00  | 0.00  | 0.00  | 0.00  | 0.00  |
| Min. GPCP rainfall     | 0.06  | 0.39  | 0.10  | 0.59  | 0.06  |

Figure D-12. PERSIANN band D, bias corrected.

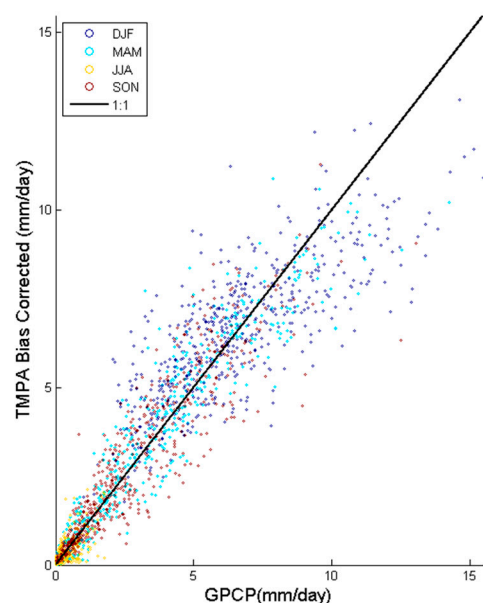

| STATISTIC              | DJF   | MAM   | JJA   | SON   | ALL   |
|------------------------|-------|-------|-------|-------|-------|
| N                      | 542   | 552   | 552   | 546   | 2192  |
| Mean SPP (mm/day)      | 6.52  | 3.27  | 0.26  | 2.85  | 3.21  |
| Mean GPCP (mm/day)     | 6.50  | 3.24  | 0.25  | 2.83  | 3.19  |
| Std. dev. SPP (mm/d... | 1.92  | 2.71  | 0.33  | 2.23  | 2.99  |
| Std. dev. SPP (mm/d... | 1.92  | 2.71  | 0.33  | 2.23  | 2.99  |
| Bias (%)               | 0.33  | 0.91  | 5.99  | 0.70  | 0.67  |
| MSE from mean          | 0.00  | 0.00  | 0.00  | 0.00  | 0.00  |
| MSE from variance      | 0.57  | 0.02  | 0.00  | 0.00  | 0.03  |
| MSE from correlation   | 2.14  | 0.75  | 0.06  | 0.90  | 1.07  |
| MSE                    | 2.71  | 0.77  | 0.06  | 0.90  | 1.10  |
| RMSE                   | 1.64  | 0.88  | 0.25  | 0.95  | 1.05  |
| Correlation coeff.     | 0.792 | 0.952 | 0.723 | 0.913 | 0.944 |
| Nash-Sutcliffe Eff.    | 0.622 | 0.905 | 0.463 | 0.829 | 0.891 |
| Max. SPP rainfall      | 13.11 | 10.89 | 2.14  | 11.28 | 13.11 |
| Max. GPCP rainfall     | 15.48 | 14.24 | 1.78  | 13.07 | 15.48 |
| Min. SPP rainfall      | 1.77  | 0.02  | 0.00  | 0.08  | 0.00  |
| Min. GPCP rainfall     | 1.00  | 0.00  | 0.00  | 0.02  | 0.00  |

Figure D-13. TMPA band E, bias corrected.

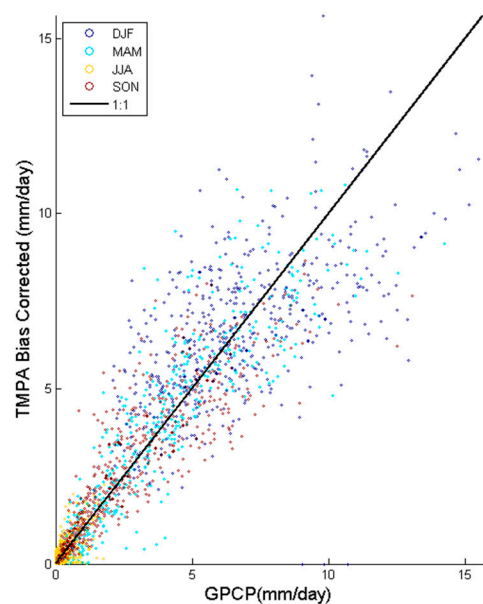

| STATISTIC              | DJF   | MAM   | JJA   | SON   | ALL   |
|------------------------|-------|-------|-------|-------|-------|
| N                      | 542   | 552   | 552   | 546   | 2192  |
| Mean SPP (mm/day)      | 6.45  | 3.25  | 0.30  | 2.82  | 3.19  |
| Mean GPCP (mm/day)     | 6.50  | 3.24  | 0.25  | 2.83  | 3.19  |
| Std. dev. SPP (mm/d... | 2.09  | 2.80  | 0.35  | 2.00  | 2.98  |
| Std. dev. SPP (mm/d... | 2.09  | 2.80  | 0.35  | 2.00  | 2.98  |
| Bias (%)               | -0.75 | 0.47  | 21.35 | -0.46 | 0.06  |
| MSE from mean          | 0.00  | 0.00  | 0.00  | 0.00  | 0.00  |
| MSE from variance      | 0.34  | 0.00  | 0.00  | 0.09  | 0.04  |
| MSE from correlation   | 4.30  | 1.36  | 0.08  | 1.19  | 1.79  |
| MSE                    | 4.65  | 1.36  | 0.08  | 1.27  | 1.83  |
| RMSE                   | 2.15  | 1.17  | 0.29  | 1.13  | 1.35  |
| Correlation coeff.     | 0.616 | 0.915 | 0.670 | 0.871 | 0.905 |
| Nash-Sutcliffe Eff.    | 0.352 | 0.832 | 0.288 | 0.759 | 0.819 |
| Max. SPP rainfall      | 15.65 | 10.83 | 2.26  | 8.66  | 15.65 |
| Max. GPCP rainfall     | 15.48 | 14.24 | 1.78  | 13.07 | 15.48 |
| Min. SPP rainfall      | 0.00  | 0.00  | 0.00  | 0.03  | 0.00  |
| Min. GPCP rainfall     | 1.00  | 0.00  | 0.00  | 0.02  | 0.00  |

Figure D-14. CMORPH band E, bias corrected.



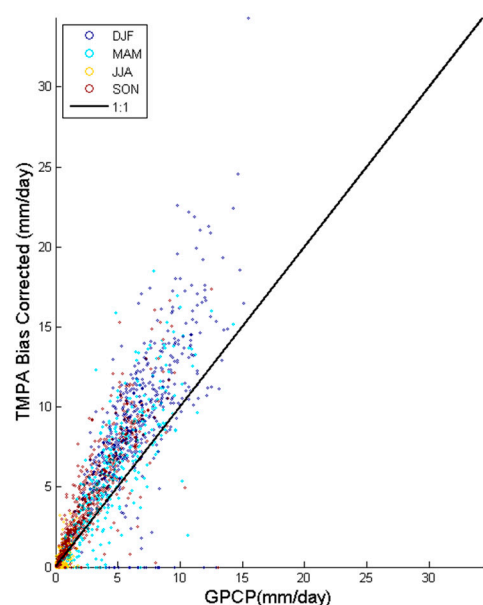

| STATISTIC              | DJF    | MAM   | JJA    | SON    | ALL   |
|------------------------|--------|-------|--------|--------|-------|
| N                      | 542    | 552   | 552    | 546    | 2192  |
| Mean SPP (mm/day)      | 8.98   | 4.11  | 0.25   | 4.24   | 4.37  |
| Mean GPCP (mm/day)     | 6.50   | 3.24  | 0.25   | 2.83   | 3.19  |
| Std. dev. SPP (mm/d... | 4.28   | 4.03  | 0.53   | 3.40   | 4.60  |
| Std. dev. SPP (mm/d... | 4.28   | 4.03  | 0.53   | 3.40   | 4.60  |
| Bias (%)               | 38.11  | 27.00 | 0.26   | 49.75  | 37.11 |
| MSE from mean          | 6.14   | 0.76  | 0.00   | 1.99   | 1.40  |
| MSE from variance      | 2.58   | 1.39  | 0.04   | 1.22   | 2.02  |
| MSE from correlation   | 6.81   | 2.50  | 0.12   | 2.45   | 3.03  |
| MSE                    | 15.53  | 4.66  | 0.15   | 5.66   | 6.45  |
| RMSE                   | 3.94   | 2.16  | 0.39   | 2.38   | 2.54  |
| Correlation coeff.     | 0.703  | 0.891 | 0.675  | 0.843  | 0.896 |
| Nash-Sutcliffe Eff.    | -1.168 | 0.426 | -0.332 | -0.074 | 0.359 |
| Max. SPP rainfall      | 34.33  | 18.50 | 3.35   | 17.40  | 34.33 |
| Max. GPCP rainfall     | 15.48  | 14.24 | 1.78   | 13.07  | 15.48 |
| Min. SPP rainfall      | 0.00   | 0.00  | 0.00   | 0.00   | 0.00  |
| Min. GPCP rainfall     | 1.00   | 0.00  | 0.00   | 0.02   | 0.00  |

Figure D-15. PERSIANN band E, bias corrected.

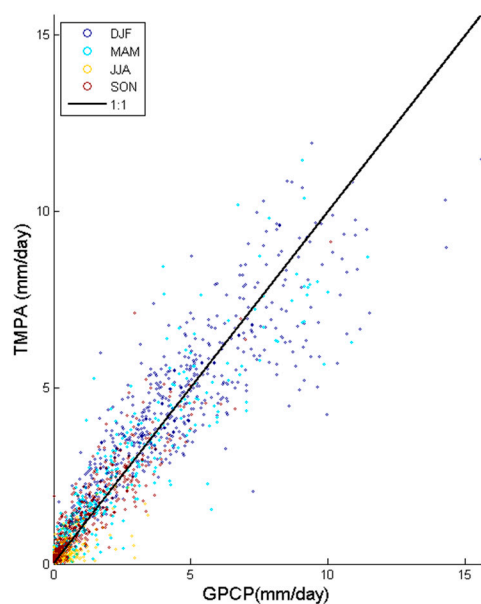

| STATISTIC              | DJF   | MAM   | JJA   | SON   | ALL   |
|------------------------|-------|-------|-------|-------|-------|
| N                      | 542   | 552   | 552   | 546   | 2192  |
| Mean SPP (mm/day)      | 4.56  | 1.70  | 0.24  | 1.23  | 1.92  |
| Mean GPCP (mm/day)     | 4.44  | 1.60  | 0.25  | 1.10  | 1.84  |
| Std. dev. SPP (mm/d... | 2.21  | 2.07  | 0.27  | 1.29  | 2.30  |
| Std. dev. SPP (mm/d... | 2.21  | 2.07  | 0.27  | 1.29  | 2.30  |
| Bias (%)               | 2.51  | 5.70  | -3.24 | 11.66 | 4.38  |
| MSE from mean          | 0.01  | 0.01  | 0.00  | 0.02  | 0.01  |
| MSE from variance      | 0.21  | 0.02  | 0.03  | 0.00  | 0.02  |
| MSE from correlation   | 1.59  | 0.67  | 0.08  | 0.30  | 0.70  |
| MSE                    | 1.82  | 0.70  | 0.11  | 0.31  | 0.73  |
| RMSE                   | 1.35  | 0.83  | 0.34  | 0.56  | 0.85  |
| Correlation coeff.     | 0.865 | 0.927 | 0.677 | 0.914 | 0.937 |
| Nash-Sutcliffe Eff.    | 0.745 | 0.858 | 0.452 | 0.824 | 0.877 |
| Max. SPP rainfall      | 11.94 | 11.44 | 2.18  | 9.14  | 11.94 |
| Max. GPCP rainfall     | 15.56 | 11.44 | 3.42  | 10.09 | 15.56 |
| Min. SPP rainfall      | 0.04  | 0.03  | 0.02  | 0.04  | 0.02  |
| Min. GPCP rainfall     | 0.00  | 0.00  | 0.00  | 0.00  | 0.00  |

Figure D-16. TMPA band F, bias corrected.

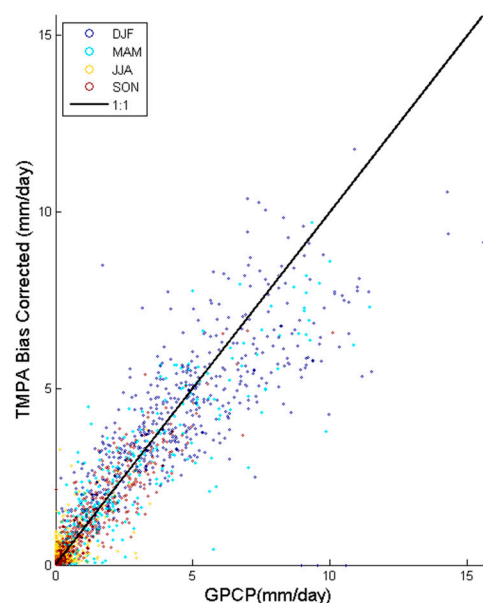

| STATISTIC              | DJF   | MAM   | JJA   | SON   | ALL   |
|------------------------|-------|-------|-------|-------|-------|
| N                      | 542   | 552   | 552   | 546   | 2192  |
| Mean SPP (mm/day)      | 4.18  | 1.51  | 0.37  | 1.08  | 1.78  |
| Mean GPCP (mm/day)     | 4.44  | 1.60  | 0.25  | 1.10  | 1.84  |
| Std. dev. SPP (mm/d... | 2.07  | 1.89  | 0.41  | 1.22  | 2.11  |
| Std. dev. SPP (mm/d... | 2.07  | 1.89  | 0.41  | 1.22  | 2.11  |
| Bias (%)               | -5.92 | -5.69 | 45.47 | -2.29 | -3.55 |
| MSE from mean          | 0.07  | 0.01  | 0.01  | 0.00  | 0.00  |
| MSE from variance      | 0.36  | 0.11  | 0.00  | 0.01  | 0.11  |
| MSE from correlation   | 2.39  | 0.71  | 0.17  | 0.29  | 0.91  |
| MSE                    | 2.82  | 0.82  | 0.19  | 0.30  | 1.03  |
| RMSE                   | 1.68  | 0.91  | 0.44  | 0.55  | 1.01  |
| Correlation coeff.     | 0.783 | 0.915 | 0.533 | 0.912 | 0.911 |
| Nash-Sutcliffe Eff.    | 0.603 | 0.832 | 0.084 | 0.832 | 0.827 |
| Max. SPP rainfall      | 11.78 | 9.71  | 3.85  | 6.64  | 11.78 |
| Max. GPCP rainfall     | 15.56 | 11.44 | 3.42  | 10.09 | 15.56 |
| Min. SPP rainfall      | 0.00  | 0.01  | 0.02  | 0.00  | 0.00  |
| Min. GPCP rainfall     | 0.00  | 0.00  | 0.00  | 0.00  | 0.00  |

Figure D-17. CMORPH band F, bias corrected.

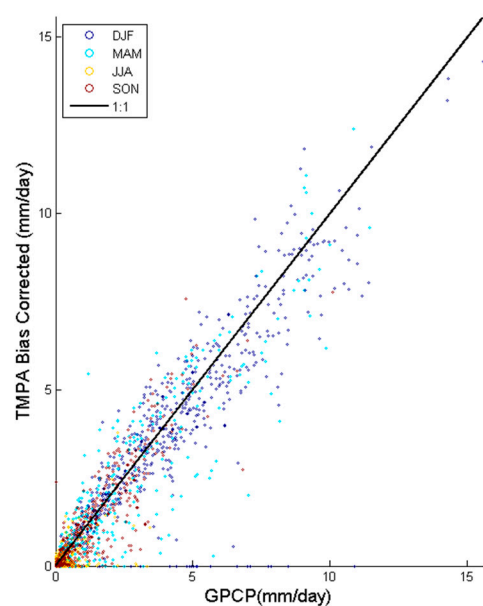

| STATISTIC              | DJF   | MAM   | JJA    | SON   | ALL   |
|------------------------|-------|-------|--------|-------|-------|
| N                      | 542   | 552   | 552    | 546   | 2192  |
| Mean SPP (mm/day)      | 4.07  | 1.46  | 0.13   | 1.02  | 1.66  |
| Mean GPCP (mm/day)     | 4.44  | 1.60  | 0.25   | 1.10  | 1.84  |
| Std. dev. SPP (mm/d... | 2.58  | 2.16  | 0.33   | 1.37  | 2.34  |
| Std. dev. SPP (mm/d... | 2.58  | 2.16  | 0.33   | 1.37  | 2.34  |
| Bias (%)               | -8.33 | -9.19 | -49.11 | -7.42 | -9.79 |
| MSE from mean          | 0.14  | 0.02  | 0.02   | 0.01  | 0.03  |
| MSE from variance      | 0.01  | 0.00  | 0.02   | 0.00  | 0.01  |
| MSE from correlation   | 2.11  | 0.79  | 0.13   | 0.36  | 0.85  |
| MSE                    | 2.25  | 0.82  | 0.16   | 0.37  | 0.90  |
| RMSE                   | 1.50  | 0.90  | 0.40   | 0.61  | 0.95  |
| Correlation coeff.     | 0.847 | 0.917 | 0.561  | 0.902 | 0.925 |
| Nash-Sutcliffe Eff.    | 0.683 | 0.833 | 0.213  | 0.794 | 0.850 |
| Max. SPP rainfall      | 14.31 | 12.40 | 3.77   | 7.75  | 14.31 |
| Max. GPCP rainfall     | 15.56 | 11.44 | 3.42   | 10.09 | 15.56 |
| Min. SPP rainfall      | 0.00  | 0.00  | 0.00   | 0.00  | 0.00  |
| Min. GPCP rainfall     | 0.00  | 0.00  | 0.00   | 0.00  | 0.00  |

Figure D-18. PERSIANN band F, bias corrected.

## E. Bias Corrected Estimates Error Analysis for Koppen Geiger Climatic Classification Zones.

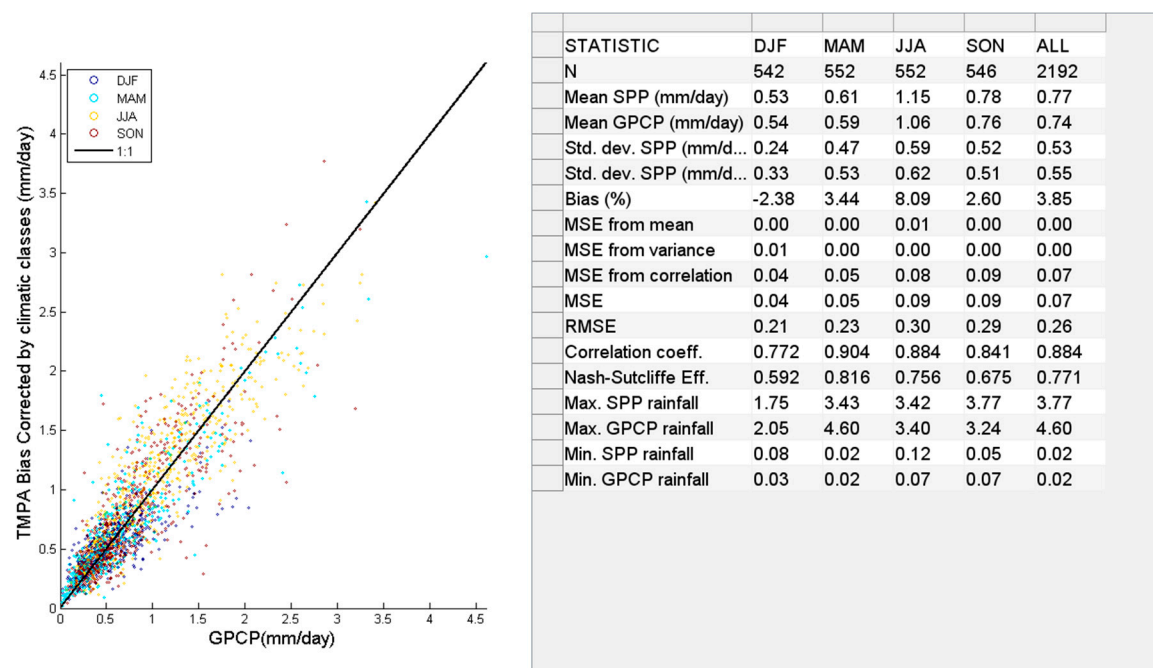

Figure E-1. TMPA Arid zone, bias corrected.

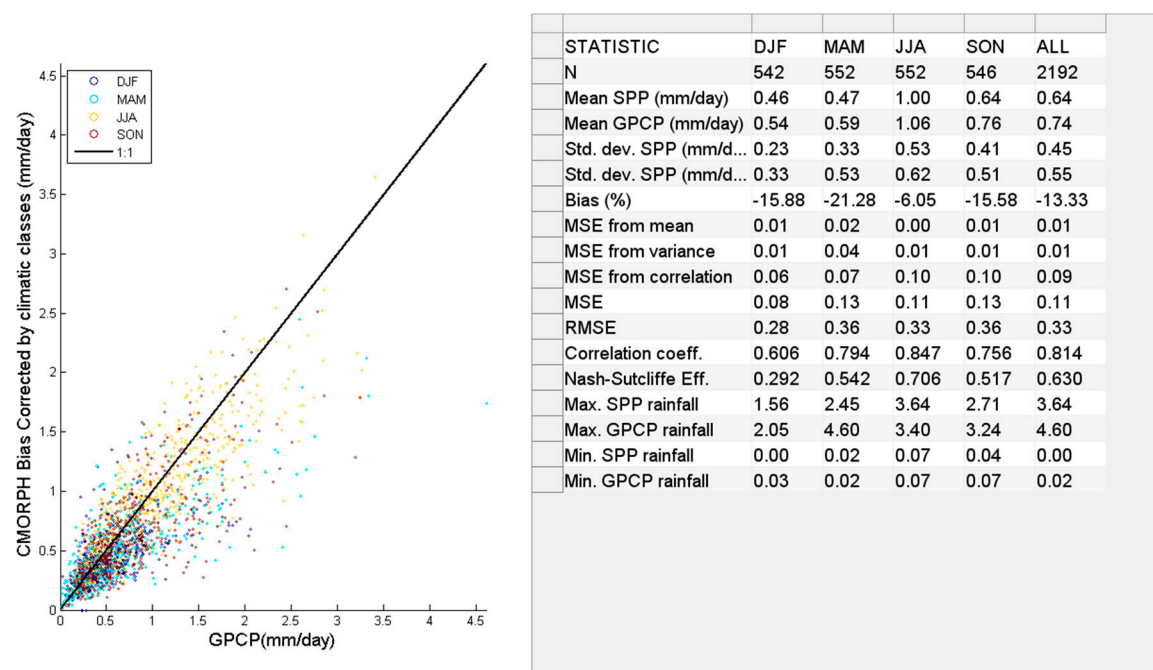

Figure E-2. CMORPH Arid zone, bias corrected.

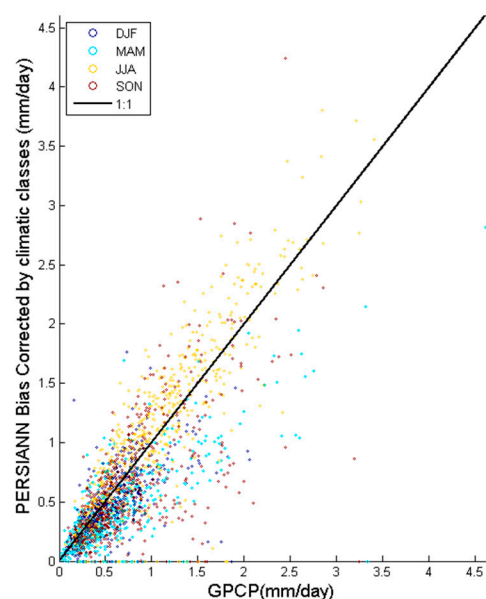

| STATISTIC              | DJF    | MAM    | JJA   | SON    | ALL    |
|------------------------|--------|--------|-------|--------|--------|
| N                      | 542    | 552    | 552   | 546    | 2192   |
| Mean SPP (mm/day)      | 0.45   | 0.40   | 1.13  | 0.63   | 0.65   |
| Mean GPCP (mm/day)     | 0.54   | 0.59   | 1.06  | 0.76   | 0.74   |
| Std. dev. SPP (mm/d... | 0.28   | 0.36   | 0.70  | 0.52   | 0.57   |
| Std. dev. SPP (mm/d... | 0.33   | 0.53   | 0.62  | 0.51   | 0.55   |
| Bias (%)               | -17.47 | -31.85 | 5.88  | -16.27 | -11.61 |
| MSE from mean          | 0.01   | 0.04   | 0.00  | 0.02   | 0.01   |
| MSE from variance      | 0.00   | 0.03   | 0.01  | 0.00   | 0.00   |
| MSE from correlation   | 0.07   | 0.08   | 0.12  | 0.18   | 0.13   |
| MSE                    | 0.08   | 0.15   | 0.13  | 0.19   | 0.14   |
| RMSE                   | 0.28   | 0.39   | 0.36  | 0.44   | 0.37   |
| Correlation coeff.     | 0.643  | 0.775  | 0.860 | 0.664  | 0.791  |
| Nash-Sutcliffe Eff.    | 0.290  | 0.462  | 0.656 | 0.271  | 0.541  |
| Max. SPP rainfall      | 1.76   | 2.82   | 3.81  | 4.25   | 4.25   |
| Max. GPCP rainfall     | 2.05   | 4.60   | 3.40  | 3.24   | 4.60   |
| Min. SPP rainfall      | 0.00   | 0.00   | 0.00  | 0.00   | 0.00   |
| Min. GPCP rainfall     | 0.03   | 0.02   | 0.07  | 0.07   | 0.02   |

Figure E-3. PERSIANN arid zone, bias corrected.

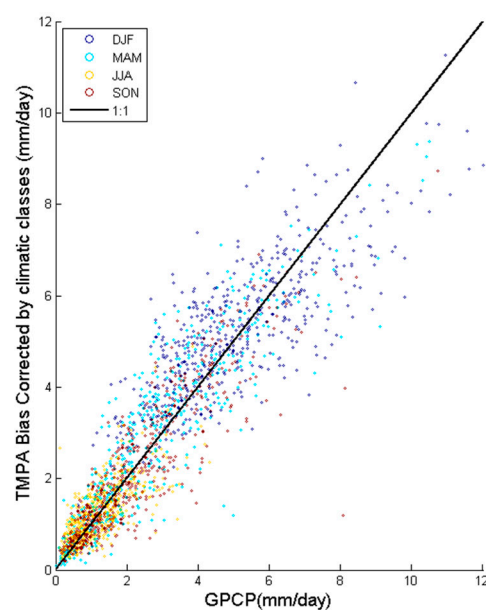

| STATISTIC              | DJF   | MAM   | JJA   | SON   | ALL   |
|------------------------|-------|-------|-------|-------|-------|
| N                      | 542   | 552   | 552   | 546   | 2192  |
| Mean SPP (mm/day)      | 5.13  | 2.68  | 1.21  | 2.15  | 2.78  |
| Mean GPCP (mm/day)     | 4.96  | 2.55  | 1.17  | 2.20  | 2.71  |
| Std. dev. SPP (mm/d... | 1.55  | 1.93  | 0.62  | 1.48  | 2.06  |
| Std. dev. SPP (mm/d... | 2.00  | 1.98  | 0.74  | 1.60  | 2.16  |
| Bias (%)               | 3.53  | 5.19  | 3.21  | -2.67 | 2.63  |
| MSE from mean          | 0.03  | 0.02  | 0.00  | 0.00  | 0.01  |
| MSE from variance      | 0.20  | 0.00  | 0.01  | 0.01  | 0.01  |
| MSE from correlation   | 1.24  | 0.66  | 0.24  | 0.54  | 0.72  |
| MSE                    | 1.47  | 0.68  | 0.25  | 0.56  | 0.74  |
| RMSE                   | 1.21  | 0.83  | 0.50  | 0.74  | 0.86  |
| Correlation coeff.     | 0.800 | 0.913 | 0.743 | 0.886 | 0.919 |
| Nash-Sutcliffe Eff.    | 0.631 | 0.826 | 0.540 | 0.783 | 0.842 |
| Max. SPP rainfall      | 11.27 | 9.39  | 4.89  | 8.74  | 11.27 |
| Max. GPCP rainfall     | 12.01 | 10.50 | 4.33  | 10.74 | 12.01 |
| Min. SPP rainfall      | 0.85  | 0.09  | 0.26  | 0.19  | 0.09  |
| Min. GPCP rainfall     | 0.64  | 0.02  | 0.12  | 0.11  | 0.02  |

Figure E-4. TMPA warm zone, bias corrected.

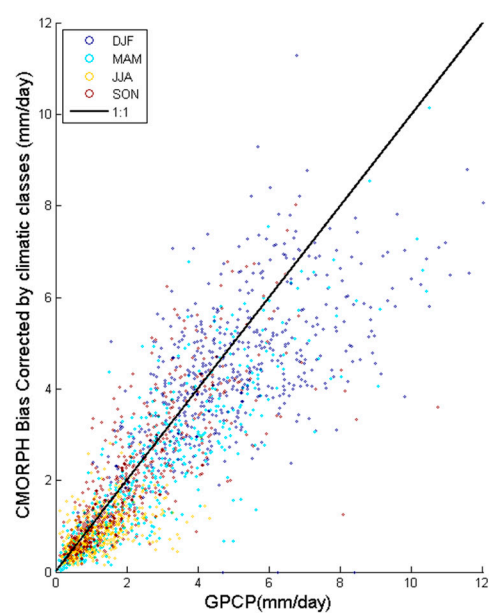

| STATISTIC              | DJF    | MAM    | JJA    | SON   | ALL    |
|------------------------|--------|--------|--------|-------|--------|
| N                      | 542    | 552    | 552    | 546   | 2192   |
| Mean SPP (mm/day)      | 4.37   | 2.07   | 0.84   | 2.08  | 2.33   |
| Mean GPCP (mm/day)     | 4.96   | 2.55   | 1.17   | 2.20  | 2.71   |
| Std. dev. SPP (mm/d... | 1.54   | 1.67   | 0.46   | 1.49  | 1.88   |
| Std. dev. SPP (mm/d... | 2.00   | 1.98   | 0.74   | 1.60  | 2.16   |
| Bias (%)               | -11.82 | -18.93 | -28.65 | -5.52 | -14.06 |
| MSE from mean          | 0.34   | 0.23   | 0.11   | 0.01  | 0.15   |
| MSE from variance      | 0.21   | 0.09   | 0.08   | 0.01  | 0.08   |
| MSE from correlation   | 2.43   | 0.86   | 0.30   | 0.97  | 1.18   |
| MSE                    | 2.99   | 1.19   | 0.49   | 1.00  | 1.41   |
| RMSE                   | 1.73   | 1.09   | 0.70   | 1.00  | 1.19   |
| Correlation coeff.     | 0.604  | 0.870  | 0.558  | 0.796 | 0.854  |
| Nash-Sutcliffe Eff.    | 0.252  | 0.697  | 0.101  | 0.610 | 0.698  |
| Max. SPP rainfall      | 11.29  | 10.14  | 2.94   | 8.03  | 11.29  |
| Max. GPCP rainfall     | 12.01  | 10.50  | 4.33   | 10.74 | 12.01  |
| Min. SPP rainfall      | 0.00   | 0.03   | 0.15   | 0.17  | 0.00   |
| Min. GPCP rainfall     | 0.64   | 0.02   | 0.12   | 0.11  | 0.02   |

Figure E-5. CMORPH warm zone, bias corrected.

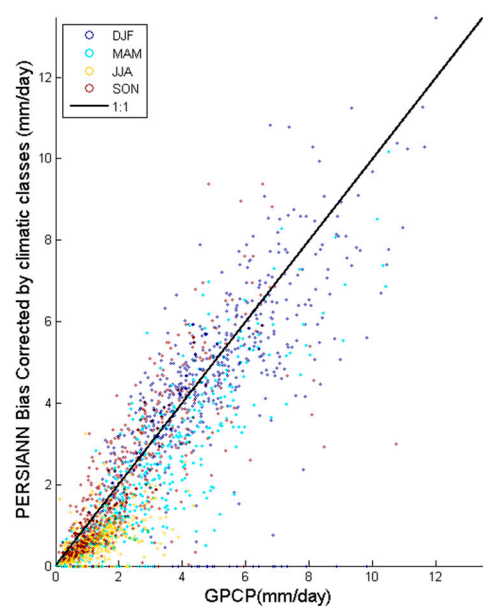

| STATISTIC              | DJF   | MAM    | JJA    | SON   | ALL    |
|------------------------|-------|--------|--------|-------|--------|
| N                      | 542   | 552    | 552    | 546   | 2192   |
| Mean SPP (mm/day)      | 4.60  | 1.89   | 0.60   | 2.07  | 2.28   |
| Mean GPCP (mm/day)     | 4.96  | 2.55   | 1.17   | 2.20  | 2.71   |
| Std. dev. SPP (mm/d... | 2.06  | 1.79   | 0.45   | 1.74  | 2.18   |
| Std. dev. SPP (mm/d... | 2.00  | 1.98   | 0.74   | 1.60  | 2.16   |
| Bias (%)               | -7.11 | -25.87 | -48.62 | -6.00 | -15.85 |
| MSE from mean          | 0.12  | 0.44   | 0.32   | 0.02  | 0.18   |
| MSE from variance      | 0.00  | 0.04   | 0.08   | 0.02  | 0.00   |
| MSE from correlation   | 2.76  | 0.80   | 0.26   | 1.08  | 1.30   |
| MSE                    | 2.89  | 1.28   | 0.67   | 1.12  | 1.48   |
| RMSE                   | 1.70  | 1.13   | 0.82   | 1.06  | 1.22   |
| Correlation coeff.     | 0.665 | 0.887  | 0.606  | 0.806 | 0.862  |
| Nash-Sutcliffe Eff.    | 0.277 | 0.675  | -0.228 | 0.562 | 0.682  |
| Max. SPP rainfall      | 13.47 | 10.17  | 3.26   | 9.38  | 13.47  |
| Max. GPCP rainfall     | 12.01 | 10.50  | 4.33   | 10.74 | 12.01  |
| Min. SPP rainfall      | 0.00  | 0.00   | 0.00   | 0.00  | 0.00   |
| Min. GPCP rainfall     | 0.64  | 0.02   | 0.12   | 0.11  | 0.02   |

Figure E-6. PERSIANN warm zone, bias corrected.



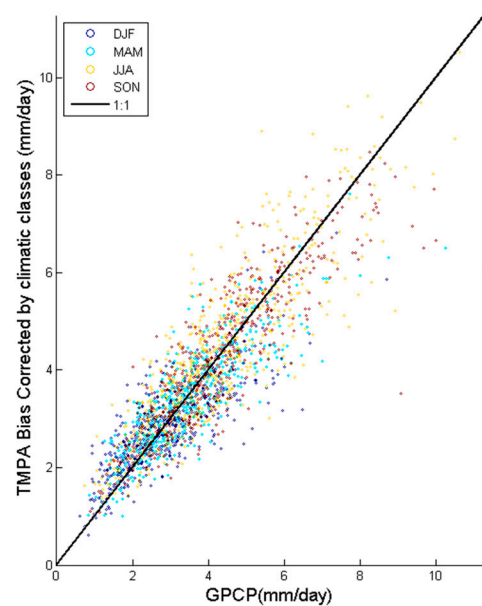

| STATISTIC              | DJF   | MAM   | JJA   | SON   | ALL   |
|------------------------|-------|-------|-------|-------|-------|
| N                      | 542   | 552   | 552   | 546   | 2192  |
| Mean SPP (mm/day)      | 2.90  | 3.38  | 4.47  | 4.23  | 3.74  |
| Mean GPCP (mm/day)     | 2.96  | 3.42  | 4.37  | 4.24  | 3.75  |
| Std. dev. SPP (mm/d... | 0.90  | 1.01  | 1.66  | 1.47  | 1.44  |
| Std. dev. SPP (mm/d... | 1.23  | 1.26  | 1.80  | 1.63  | 1.61  |
| Bias (%)               | -2.35 | -1.15 | 2.09  | -0.26 | -0.18 |
| MSE from mean          | 0.00  | 0.00  | 0.01  | 0.00  | 0.00  |
| MSE from variance      | 0.11  | 0.07  | 0.02  | 0.03  | 0.03  |
| MSE from correlation   | 0.43  | 0.39  | 0.86  | 0.54  | 0.59  |
| MSE                    | 0.55  | 0.45  | 0.88  | 0.57  | 0.61  |
| RMSE                   | 0.74  | 0.67  | 0.94  | 0.75  | 0.78  |
| Correlation coeff.     | 0.805 | 0.848 | 0.857 | 0.887 | 0.874 |
| Nash-Sutcliffe Eff.    | 0.640 | 0.716 | 0.728 | 0.786 | 0.764 |
| Max. SPP rainfall      | 6.81  | 7.61  | 10.51 | 8.48  | 10.51 |
| Max. GPCP rainfall     | 8.72  | 10.24 | 11.27 | 10.02 | 11.27 |
| Min. SPP rainfall      | 0.60  | 1.00  | 1.38  | 1.08  | 0.60  |
| Min. GPCP rainfall     | 0.62  | 0.84  | 0.74  | 0.89  | 0.62  |

Figure E-7. TMPA tropical zone, bias corrected.

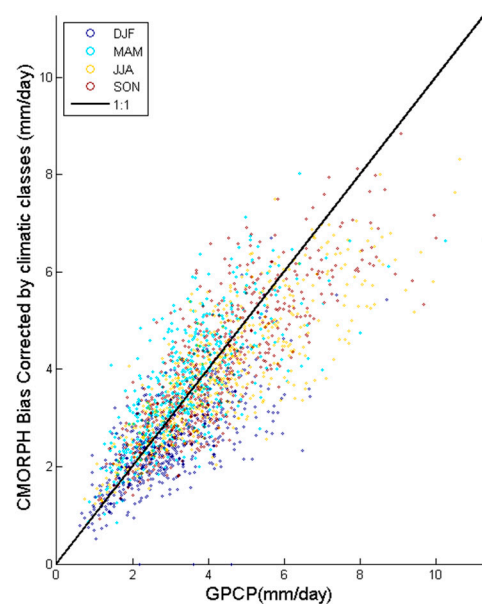

| STATISTIC              | DJF    | MAM   | JJA   | SON   | ALL   |
|------------------------|--------|-------|-------|-------|-------|
| N                      | 542    | 552   | 552   | 546   | 2192  |
| Mean SPP (mm/day)      | 2.48   | 3.63  | 3.97  | 4.04  | 3.53  |
| Mean GPCP (mm/day)     | 2.96   | 3.42  | 4.37  | 4.24  | 3.75  |
| Std. dev. SPP (mm/d... | 0.89   | 1.20  | 1.30  | 1.43  | 1.37  |
| Std. dev. SPP (mm/d... | 1.23   | 1.26  | 1.80  | 1.63  | 1.61  |
| Bias (%)               | -16.40 | 6.34  | -9.22 | -4.65 | -5.77 |
| MSE from mean          | 0.24   | 0.05  | 0.16  | 0.04  | 0.05  |
| MSE from variance      | 0.11   | 0.00  | 0.25  | 0.04  | 0.06  |
| MSE from correlation   | 0.69   | 0.77  | 0.86  | 0.82  | 0.90  |
| MSE                    | 1.04   | 0.82  | 1.27  | 0.90  | 1.01  |
| RMSE                   | 1.02   | 0.90  | 1.13  | 0.95  | 1.00  |
| Correlation coeff.     | 0.688  | 0.746 | 0.816 | 0.825 | 0.796 |
| Nash-Sutcliffe Eff.    | 0.315  | 0.488 | 0.608 | 0.664 | 0.612 |
| Max. SPP rainfall      | 6.71   | 8.02  | 8.31  | 8.84  | 8.84  |
| Max. GPCP rainfall     | 8.72   | 10.24 | 11.27 | 10.02 | 11.27 |
| Min. SPP rainfall      | 0.00   | 0.85  | 1.23  | 0.91  | 0.00  |
| Min. GPCP rainfall     | 0.62   | 0.84  | 0.74  | 0.89  | 0.62  |

Figure E-8. CMORPH tropical zone, bias corrected.

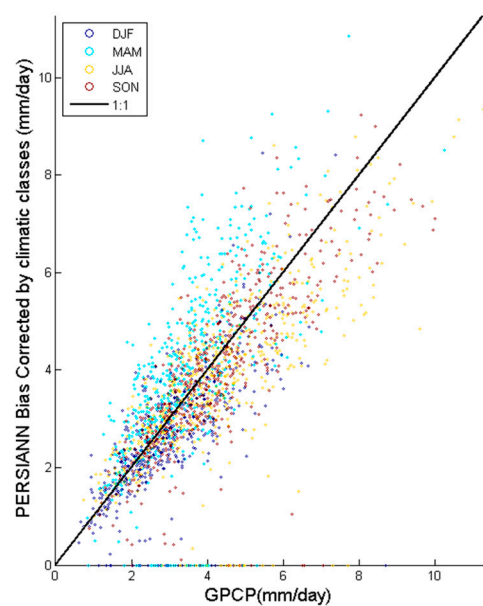

| STATISTIC              | DJF    | MAM    | JJA    | SON   | ALL   |
|------------------------|--------|--------|--------|-------|-------|
| N                      | 542    | 552    | 552    | 546   | 2192  |
| Mean SPP (mm/day)      | 2.64   | 3.84   | 3.90   | 3.96  | 3.59  |
| Mean GPCP (mm/day)     | 2.96   | 3.42   | 4.37   | 4.24  | 3.75  |
| Std. dev. SPP (mm/d... | 1.22   | 1.84   | 1.62   | 1.66  | 1.69  |
| Std. dev. SPP (mm/d... | 1.23   | 1.26   | 1.80   | 1.63  | 1.61  |
| Bias (%)               | -10.80 | 12.30  | -10.85 | -6.61 | -4.34 |
| MSE from mean          | 0.10   | 0.18   | 0.23   | 0.08  | 0.03  |
| MSE from variance      | 0.00   | 0.33   | 0.03   | 0.00  | 0.01  |
| MSE from correlation   | 0.94   | 1.51   | 1.62   | 1.16  | 1.51  |
| MSE                    | 1.04   | 2.01   | 1.88   | 1.24  | 1.54  |
| RMSE                   | 1.02   | 1.42   | 1.37   | 1.11  | 1.24  |
| Correlation coeff.     | 0.688  | 0.675  | 0.722  | 0.786 | 0.722 |
| Nash-Sutcliffe Eff.    | 0.312  | -0.258 | 0.420  | 0.536 | 0.405 |
| Max. SPP rainfall      | 8.45   | 10.85  | 9.34   | 9.23  | 10.85 |
| Max. GPCP rainfall     | 8.72   | 10.24  | 11.27  | 10.02 | 11.27 |
| Min. SPP rainfall      | 0.00   | 0.00   | 0.00   | 0.00  | 0.00  |
| Min. GPCP rainfall     | 0.62   | 0.84   | 0.74   | 0.89  | 0.62  |

**Figure E-9.** PERSIANN tropical zone, bias corrected.



## F. Bias Corrected Estimates Error Analysis for Topographic Classification Zones.

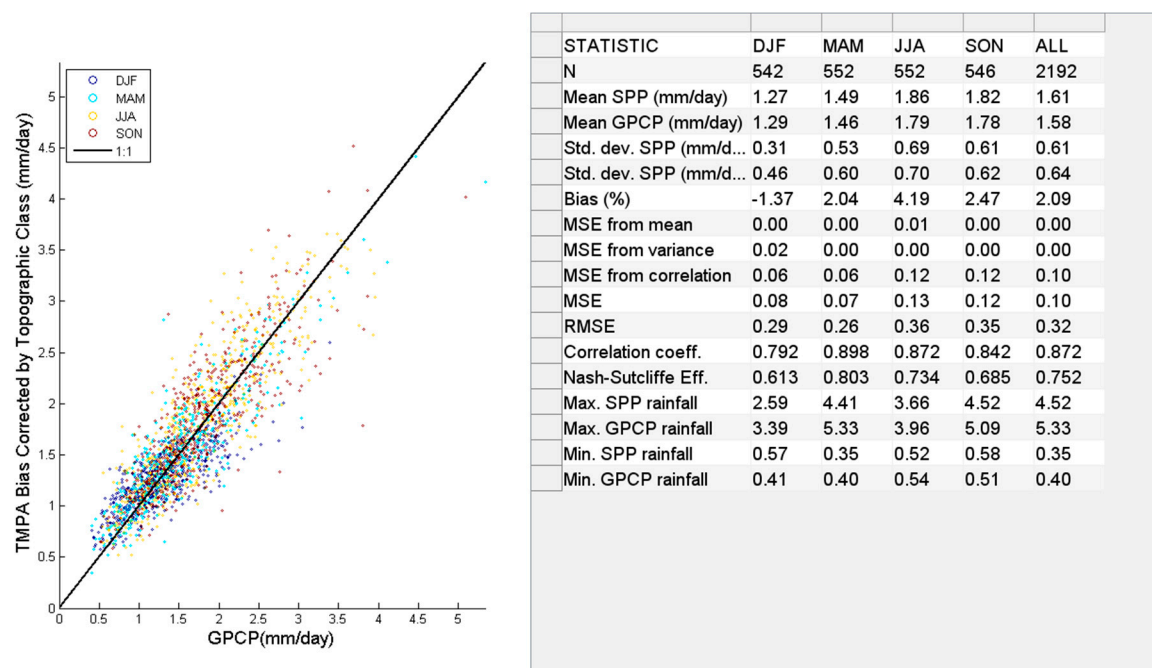

Figure F-1. TMPA plains, bias corrected.

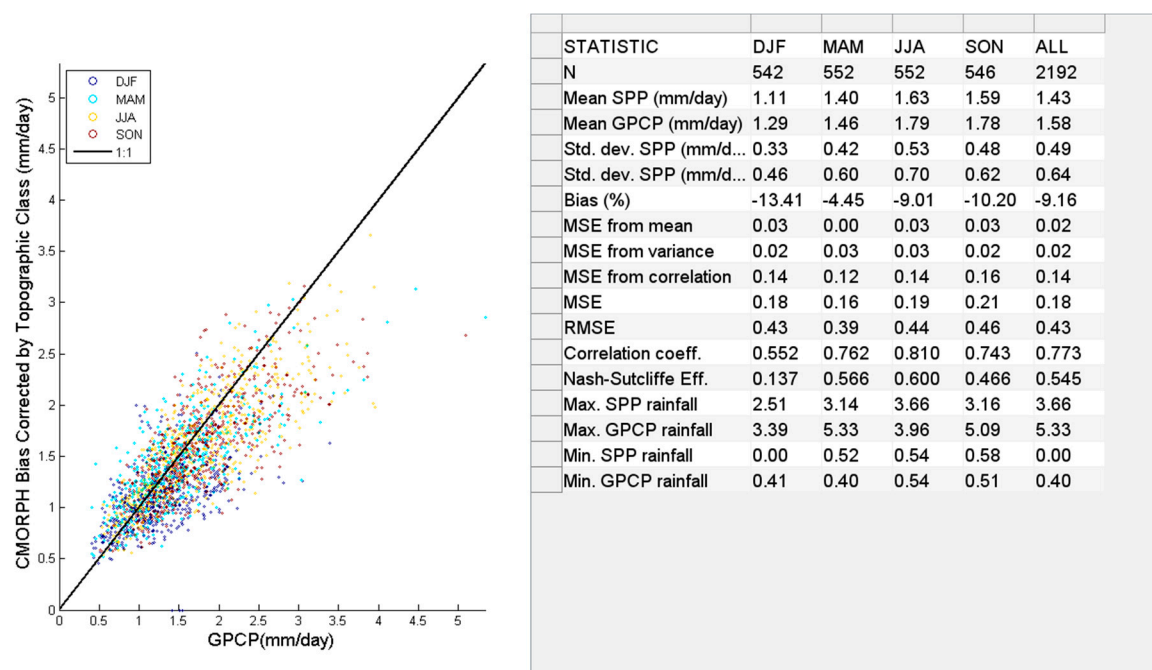

Figure F-2. CMORPH plains, bias corrected.

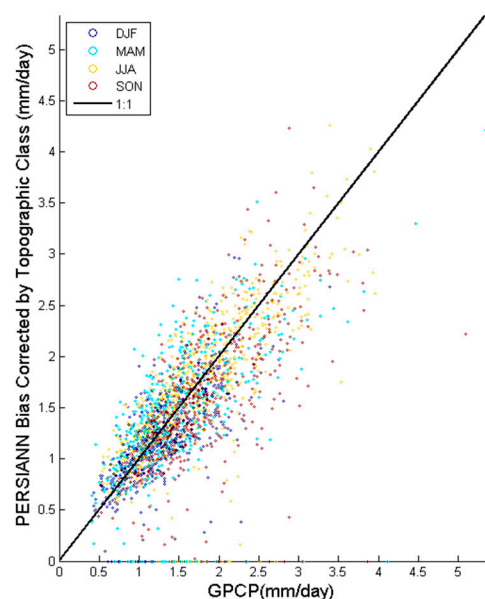

| STATISTIC              | DJF   | MAM   | JJA   | SON    | ALL   |
|------------------------|-------|-------|-------|--------|-------|
| N                      | 542   | 552   | 552   | 546    | 2192  |
| Mean SPP (mm/day)      | 1.17  | 1.41  | 1.74  | 1.57   | 1.48  |
| Mean GPCP (mm/day)     | 1.29  | 1.46  | 1.79  | 1.78   | 1.58  |
| Std. dev. SPP (mm/d... | 0.48  | 0.62  | 0.71  | 0.64   | 0.65  |
| Std. dev. SPP (mm/d... | 0.46  | 0.60  | 0.70  | 0.62   | 0.64  |
| Bias (%)               | -8.69 | -3.57 | -2.55 | -11.44 | -6.51 |
| MSE from mean          | 0.01  | 0.00  | 0.00  | 0.04   | 0.01  |
| MSE from variance      | 0.00  | 0.00  | 0.00  | 0.00   | 0.00  |
| MSE from correlation   | 0.19  | 0.29  | 0.26  | 0.29   | 0.26  |
| MSE                    | 0.20  | 0.29  | 0.26  | 0.33   | 0.27  |
| RMSE                   | 0.45  | 0.54  | 0.51  | 0.57   | 0.52  |
| Correlation coeff.     | 0.571 | 0.611 | 0.735 | 0.640  | 0.687 |
| Nash-Sutcliffe Eff.    | 0.052 | 0.178 | 0.455 | 0.159  | 0.332 |
| Max. SPP rainfall      | 2.96  | 4.21  | 4.25  | 4.23   | 4.25  |
| Max. GPCP rainfall     | 3.39  | 5.33  | 3.96  | 5.09   | 5.33  |
| Min. SPP rainfall      | 0.00  | 0.00  | 0.00  | 0.00   | 0.00  |
| Min. GPCP rainfall     | 0.41  | 0.40  | 0.54  | 0.51   | 0.40  |

Figure F-3. PERSIANN plains, bias corrected.

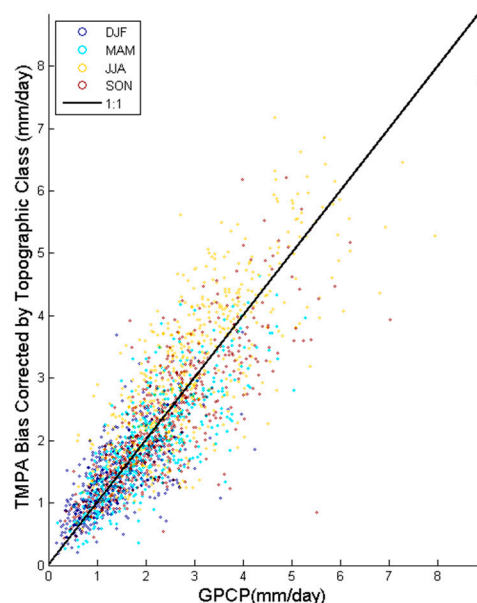

| STATISTIC              | DJF   | MAM   | JJA   | SON   | ALL   |
|------------------------|-------|-------|-------|-------|-------|
| N                      | 542   | 552   | 552   | 546   | 2192  |
| Mean SPP (mm/day)      | 1.39  | 1.92  | 3.17  | 2.31  | 2.20  |
| Mean GPCP (mm/day)     | 1.38  | 2.01  | 2.94  | 2.39  | 2.18  |
| Std. dev. SPP (mm/d... | 0.58  | 0.81  | 1.27  | 1.01  | 1.15  |
| Std. dev. SPP (mm/d... | 0.68  | 0.91  | 1.24  | 1.07  | 1.15  |
| Bias (%)               | 0.78  | -4.57 | 7.80  | -3.32 | 0.80  |
| MSE from mean          | 0.00  | 0.01  | 0.05  | 0.01  | 0.00  |
| MSE from variance      | 0.01  | 0.01  | 0.00  | 0.00  | 0.00  |
| MSE from correlation   | 0.25  | 0.29  | 0.66  | 0.43  | 0.43  |
| MSE                    | 0.26  | 0.31  | 0.71  | 0.44  | 0.43  |
| RMSE                   | 0.50  | 0.56  | 0.84  | 0.66  | 0.66  |
| Correlation coeff.     | 0.693 | 0.800 | 0.790 | 0.801 | 0.838 |
| Nash-Sutcliffe Eff.    | 0.454 | 0.621 | 0.539 | 0.617 | 0.674 |
| Max. SPP rainfall      | 3.73  | 4.64  | 7.74  | 6.21  | 7.74  |
| Max. GPCP rainfall     | 4.24  | 5.28  | 8.83  | 7.02  | 8.83  |
| Min. SPP rainfall      | 0.19  | 0.27  | 0.58  | 0.44  | 0.19  |
| Min. GPCP rainfall     | 0.16  | 0.19  | 0.57  | 0.33  | 0.16  |

Figure F-4. TMPA mountains, bias corrected.

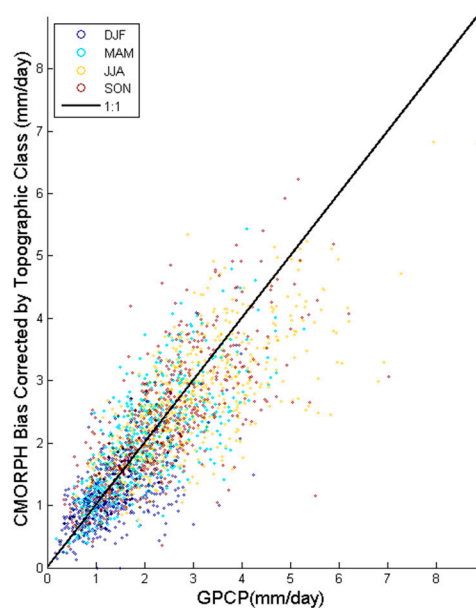

| STATISTIC              | DJF    | MAM   | JJA   | SON   | ALL   |
|------------------------|--------|-------|-------|-------|-------|
| N                      | 542    | 552   | 552   | 546   | 2192  |
| Mean SPP (mm/day)      | 1.21   | 2.00  | 2.65  | 2.32  | 2.05  |
| Mean GPCP (mm/day)     | 1.38   | 2.01  | 2.94  | 2.39  | 2.18  |
| Std. dev. SPP (mm/d... | 0.56   | 0.85  | 0.95  | 0.99  | 1.01  |
| Std. dev. SPP (mm/d... | 0.68   | 0.91  | 1.24  | 1.07  | 1.15  |
| Bias (%)               | -12.26 | -0.65 | -9.85 | -2.79 | -6.17 |
| MSE from mean          | 0.03   | 0.00  | 0.08  | 0.00  | 0.02  |
| MSE from variance      | 0.02   | 0.00  | 0.09  | 0.01  | 0.02  |
| MSE from correlation   | 0.31   | 0.42  | 0.65  | 0.57  | 0.51  |
| MSE                    | 0.35   | 0.42  | 0.82  | 0.58  | 0.54  |
| RMSE                   | 0.59   | 0.65  | 0.91  | 0.76  | 0.74  |
| Correlation coeff.     | 0.599  | 0.729 | 0.725 | 0.730 | 0.781 |
| Nash-Sutcliffe Eff.    | 0.250  | 0.488 | 0.469 | 0.493 | 0.588 |
| Max. SPP rainfall      | 4.08   | 5.43  | 6.82  | 6.23  | 6.82  |
| Max. GPCP rainfall     | 4.24   | 5.28  | 8.83  | 7.02  | 8.83  |
| Min. SPP rainfall      | 0.00   | 0.25  | 0.52  | 0.32  | 0.00  |
| Min. GPCP rainfall     | 0.16   | 0.19  | 0.57  | 0.33  | 0.16  |

Figure F-5. CMORPH mountains, bias corrected.

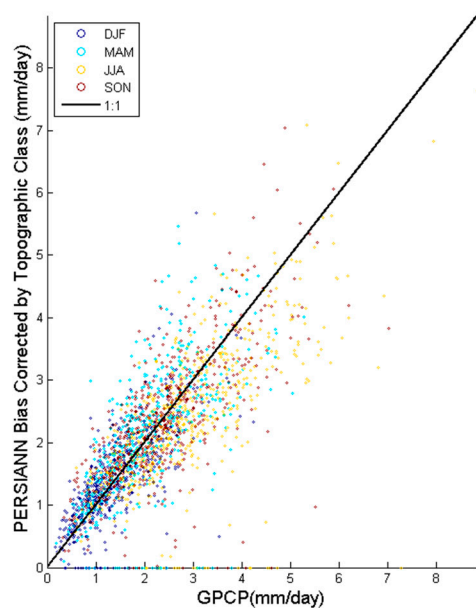

| STATISTIC              | DJF   | MAM   | JJA    | SON   | ALL   |
|------------------------|-------|-------|--------|-------|-------|
| N                      | 542   | 552   | 552    | 546   | 2192  |
| Mean SPP (mm/day)      | 1.40  | 2.01  | 2.45   | 2.33  | 2.05  |
| Mean GPCP (mm/day)     | 1.38  | 2.01  | 2.94   | 2.39  | 2.18  |
| Std. dev. SPP (mm/d... | 0.72  | 1.04  | 1.13   | 1.06  | 1.08  |
| Std. dev. SPP (mm/d... | 0.68  | 0.91  | 1.24   | 1.07  | 1.15  |
| Bias (%)               | 1.37  | 0.27  | -16.44 | -2.59 | -6.01 |
| MSE from mean          | 0.00  | 0.00  | 0.23   | 0.00  | 0.02  |
| MSE from variance      | 0.00  | 0.02  | 0.01   | 0.00  | 0.00  |
| MSE from correlation   | 0.27  | 0.68  | 0.89   | 0.67  | 0.68  |
| MSE                    | 0.27  | 0.70  | 1.13   | 0.68  | 0.70  |
| RMSE                   | 0.52  | 0.84  | 1.06   | 0.82  | 0.84  |
| Correlation coeff.     | 0.724 | 0.636 | 0.685  | 0.703 | 0.727 |
| Nash-Sutcliffe Eff.    | 0.412 | 0.143 | 0.268  | 0.412 | 0.471 |
| Max. SPP rainfall      | 5.69  | 5.47  | 7.63   | 7.03  | 7.63  |
| Max. GPCP rainfall     | 4.24  | 5.28  | 8.83   | 7.02  | 8.83  |
| Min. SPP rainfall      | 0.00  | 0.00  | 0.00   | 0.00  | 0.00  |
| Min. GPCP rainfall     | 0.16  | 0.19  | 0.57   | 0.33  | 0.16  |

Figure F-6. PERSIANN mountains, bias corrected.

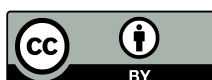

Supplement: s1 [file s1]
